# Supplementary material
Source: publisher figshare collection journal article supplement (https://acs.figshare.com/ndownloader/files/17440031)

**Construction of Complex Bisether-Bridged  
Medium-Sized Cyclic Compounds from  
*o*-(1-(Acyloxy)propargyl)benzaldehydes under Base and  
Acid Catalysis**

Yun-Long Zhao and Ying Cheng\*

College of Chemistry, Beijing Normal University, Beijing 100875, China

E-mail: ycheng2@bnu.edu.cn

1. Reaction schemes for the preparation of reactants 1. -----pS2-3
2. Crystal data and structure refinements for products 3a, 4a, 7a, 8a, 9a. -----pS4-S8
3. NMR spectra of reactants 1 and products 3, 4, 5j, 6j, 7a, 8a, 9a.-----pS9-S54
4. HRMS spectra of O<sup>18</sup>-labelled product 8a'. -----pS55

## 1. Repreparation of reactants 1.

**Scheme S1.** Preparation of 2-(1-( acetyloxy)propargyl)benzaldehydes **1a-1j**.

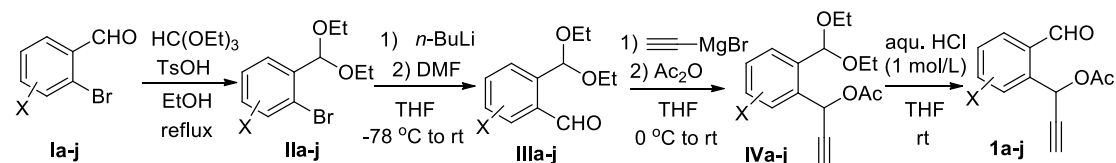

**Table S1.** The quantity of the reactant used and the chemical yield of each step in the preparation of **1a-1j**.

| I, X (mmol)                        | Yield                     |                                                             |                                                            |                                                         |
|------------------------------------|---------------------------|-------------------------------------------------------------|------------------------------------------------------------|---------------------------------------------------------|
|                                    | II                        | III                                                         | IV                                                         | 1                                                       |
| <b>Ia</b> , H (20)                 | <b>IIa</b> , 95%, 4.96 g  | <b>IIIa</b> , 87%, 3.44 g<br>(from 4.92 g of <b>IIa</b> )   | <b>IV</b> , 91%, 2.51 g<br>(from 2.06 g of <b>IIIa</b> )   | <b>1a</b> , 86%, 1.57 g<br>(from 2.49 g of <b>IVa</b> ) |
| <b>Ib</b> , 4-OMe (14)             | <b>IIb</b> , 93%, 3.76 g  | <b>IIIb</b> , 84%, 2.14 g<br>(from 3.09 g of <b>IIb</b> )   | <b>IVb</b> , 89%, 2.45 g<br>(from 2.14 g of <b>IIIb</b> )  | <b>1b</b> , 85%, 1.58 g<br>(from 2.45g of <b>IVb</b> )  |
| <b>Ic</b> , 4-Me (25.1)            | <b>IIc</b> , 99%, 6.79 g  | <b>IIIc</b> , 95%, 3.17 g<br>(from 4.1 g of <b>IIc</b> )    | <b>IVc</b> , 89%, 3.36 g<br>(from 2.89 g of <b>IIIc</b> )  | <b>1c</b> , 83%, 1.88 g<br>(from 3.05 g of <b>IVc</b> ) |
| <b>Id</b> , 4-Cl (30)              | <b>IIId</b> , 99%, 8.72 g | <b>IIId</b> , 85%, 6.13 g<br>(from 8.72 g of <b>IIId</b> )  | <b>IVd</b> , 81%, 3.65 g<br>(from 3.52 g of <b>IIId</b> )  | <b>1d</b> , 73%, 1.9 g<br>(from 3.42 g of <b>IVd</b> )  |
| <b>Ie</b> , 4-F (24.1)             | <b>IIe</b> , 89%, 5.94 g  | <b>IIIe</b> , 92%, 4.16 g<br>(from 5.54 g of <b>IIe</b> )   | <b>IVe</b> , 79%, 2.88 g<br>(from 2.81 g of <b>IIIe</b> )  | <b>1e</b> , 76%, 1.62 g<br>(from 2.85 g of <b>IVe</b> ) |
| <b>If</b> , 4-CF <sub>3</sub> (20) | <b>IIIf</b> , 91%, 5.95 g | <b>IIIIf</b> , 73%, 3.63 g<br>(from 5.89 g of <b>IIIf</b> ) | <b>IVf</b> , 94%, 4.21 g<br>(from 3.59 g of <b>IIIIf</b> ) | <b>1f</b> , 78%, 2 g<br>(from 3.27 g of <b>IVf</b> )    |
| <b>Ig</b> , 5-OMe (18.6)           | <b>IIg</b> , 96%, 5.16 g  | <b>IIIg</b> , 88%, 3.36 g<br>(from 4.63 g of <b>IIg</b> )   | <b>IVg</b> , 77%, 3.16 g<br>(from 3.19 g of <b>IIIg</b> )  | <b>1g</b> , 71%, 1.7 g<br>(from 3.16 g of <b>IVg</b> )  |
| <b>Ih</b> , 5-Me (25)              | <b>IIh</b> , 95%, 6.49 g  | <b>IIIh</b> , 78%, 3.38 g<br>(from 5.33 g of <b>IIh</b> )   | <b>IVh</b> , 83%, 3.49 g<br>(from 3.22 g of <b>IIIh</b> )  | <b>1h</b> , 71%, 1.84 g<br>(from 3.48 g of <b>IVh</b> ) |
| <b>Ii</b> , 5-Cl (11.2)            | <b>IIi</b> , 91%, 2.99 g  | <b>IIIi</b> , 90%, 2.16 g<br>(from 2.91 g of <b>IIi</b> )   | <b>IVi</b> , 85%, 2.17 g<br>(from 1.99 g of <b>IIIi</b> )  | <b>1i</b> , 74%, 1.21 g<br>(from 2.14 g of <b>IVi</b> ) |
| <b>Ij</b> , 5-F (28.8)             | <b>IIj</b> , 98%, 7.82 g  | <b>IIIj</b> , 91%, 5.81 g<br>(from 7.82 g of <b>IIj</b> )   | <b>IVj</b> , 94%, 4.4 g<br>(from 3.6 g of <b>IIIj</b> )    | <b>1j</b> , 83%, 2.67 g<br>(from 4.3 g of <b>IVj</b> )  |

**Scheme S2.** Preparation of 2-(1-(benzoyloxy)propargyl)benzaldehyde **1k**.

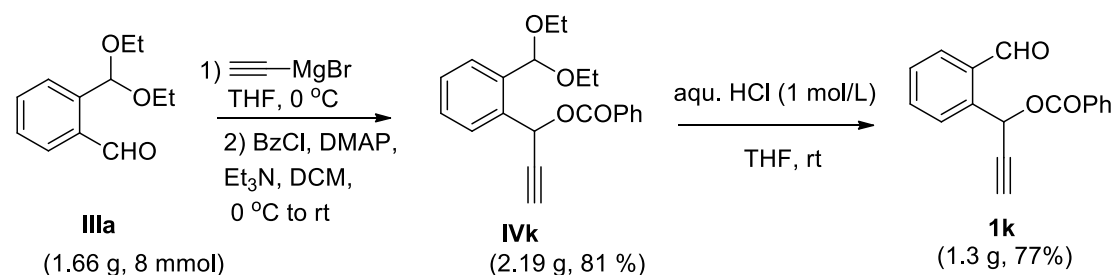

**Scheme S3.** Preparation of 2-(1-((*t*-butoxycarbonyl)oxy)propargyl)benzaldehyde **1l**.

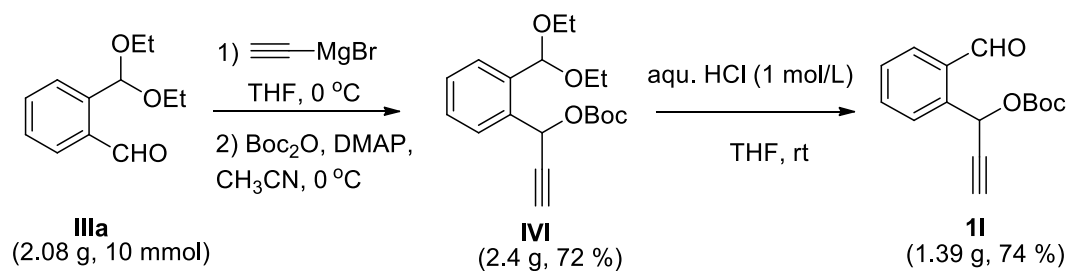

**Scheme S4.** Preparation of 2-(1-(acetyloxy)propargyl)-thiophene-3-carbaldehyde **1m**.

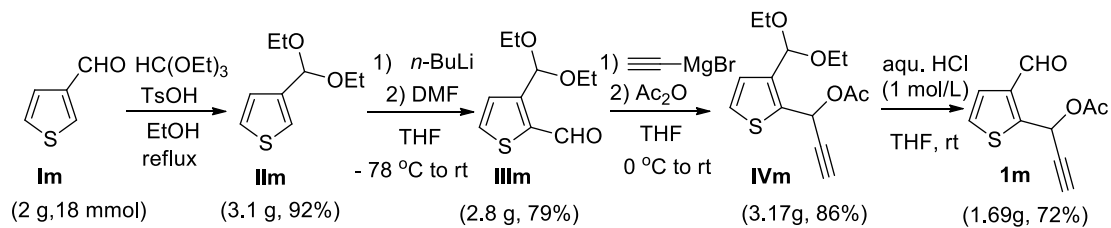

**Scheme S5.** Preparation of 2-(1-(acetyloxy)propargyl)nicotinaldehyde **1n**.

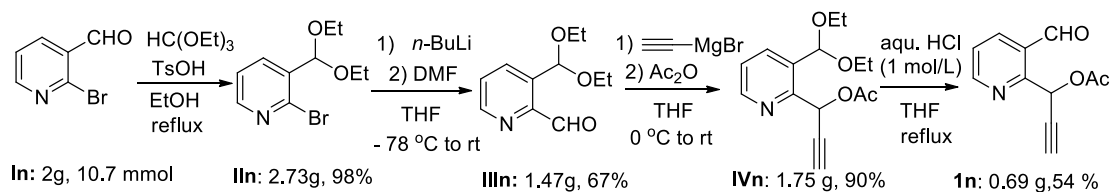

## 2. Crystal data and structure refinements for products **3a**, **4a**, **7a**, **8a** and **9a**.

Crystals of compound **3a** were obtained by slow evaporation of a solution of **3a** in dichloromethane and *n*-hexane. Single crystal X-ray diffraction intensity data of compound **3a** was collected on a 'XtaLAB Synergy R, DW system, HyPix' diffractometer equipped with graphite monochromatized CuK $\alpha$  ( $\lambda = 1.54184$  Å) at 100 K. The structure was solved by the program ShelXL (Sheldrick, 2015) and refined with the program ShelXT (Sheldrick, 2015). The crystal data and structure refinement results for compound **3a** are listed in the Table S2.

**Table S2.** Crystal data and structure refinement for **3a** (CCDC 1919071).

|                                                      |                                                                              |
|------------------------------------------------------|------------------------------------------------------------------------------|
| Identification code                                  | 20190104a                                                                    |
| Empirical formula                                    | C <sub>24</sub> H <sub>20</sub> O <sub>6</sub>                               |
| Formula weight                                       | 404.40                                                                       |
| Temperature/K                                        | 100.00(10)                                                                   |
| Crystal system                                       | orthorhombic                                                                 |
| Space group                                          | Pbca                                                                         |
| <i>a</i> /Å                                          | 20.3439(4)                                                                   |
| <i>b</i> /Å                                          | 8.3230(2)                                                                    |
| <i>c</i> /Å                                          | 22.9542(5)                                                                   |
| $\alpha$ /°                                          | 90                                                                           |
| $\beta$ /°                                           | 90                                                                           |
| $\gamma$ /°                                          | 90                                                                           |
| Volume/Å <sup>3</sup>                                | 3886.66(15)                                                                  |
| <i>Z</i>                                             | 8                                                                            |
| $\rho_{\text{calc}}$ (g/cm <sup>3</sup> )            | 1.382                                                                        |
| $\mu$ /mm <sup>-1</sup>                              | 0.822                                                                        |
| <i>F</i> (000)                                       | 1696.0                                                                       |
| Crystal size/mm <sup>3</sup>                         | 0.3 × 0.03 × 0.01                                                            |
| Radiation                                            | CuK $\alpha$ ( $\lambda = 1.54184$ )                                         |
| 2 $\theta$ range for data collection/°               | 7.702 to 151.186                                                             |
| Index ranges                                         | -25 ≤ <i>h</i> ≤ 25, -9 ≤ <i>k</i> ≤ 10, -25 ≤ <i>l</i> ≤ 28                 |
| Reflections collected                                | 13714                                                                        |
| Independent reflections                              | 3887 [ <i>R</i> <sub>int</sub> = 0.0325, <i>R</i> <sub>sigma</sub> = 0.0320] |
| Data/restraints/parameters                           | 3887/0/273                                                                   |
| Goodness-of-fit on <i>F</i> <sup>2</sup>             | 1.075                                                                        |
| Final <i>R</i> indexes [ <i>I</i> ≥ 2σ ( <i>I</i> )] | <i>R</i> <sub>1</sub> = 0.0378, <i>wR</i> <sub>2</sub> = 0.0940              |
| Final <i>R</i> indexes [all data]                    | <i>R</i> <sub>1</sub> = 0.0434, <i>wR</i> <sub>2</sub> = 0.1000              |
| Largest diff. peak/hole / e Å <sup>-3</sup>          | 0.24/-0.25                                                                   |

Crystals of compound **4a** were obtained by slow evaporation of a solution of **4a** in dichloromethane and *n*-hexane. Single crystal X-ray diffraction intensity data of compound **4a** was collected on a SuperNova (Dual, Cu at home/near, AtlasS2) diffractometer equipped with graphite monochromatized CuK $\alpha$  ( $\lambda = 1.54184$  Å) at 100 K. The structure was solved by the program ShelXL (Sheldrick, 2015) and refined with the program ShelXT (Sheldrick, 2015). The crystal data and structure refinement results for compound **4a** are listed in the Table S3.

**Table S3.** Crystal data and structure refinement for **4a** (CCDC 1919076).

|                                                              |                                                                              |
|--------------------------------------------------------------|------------------------------------------------------------------------------|
| Identification code                                          | 20181018a                                                                    |
| Empirical formula                                            | C <sub>24</sub> H <sub>20</sub> O <sub>6</sub>                               |
| Formula weight                                               | 404.40                                                                       |
| Temperature/K                                                | 100.00(10)                                                                   |
| Crystal system                                               | monoclinic                                                                   |
| Space group                                                  | P2 <sub>1</sub> /c                                                           |
| <i>a</i> /Å                                                  | 20.7497(5)                                                                   |
| <i>b</i> /Å                                                  | 9.0408(2)                                                                    |
| <i>c</i> /Å                                                  | 10.2972(3)                                                                   |
| $\alpha$ /°                                                  | 90                                                                           |
| $\beta$ /°                                                   | 99.140(3)                                                                    |
| $\gamma$ /°                                                  | 90                                                                           |
| Volume/Å <sup>3</sup>                                        | 1907.17(9)                                                                   |
| <i>Z</i>                                                     | 4                                                                            |
| $\rho_{\text{calc}}$ (g/cm <sup>3</sup> )                    | 1.408                                                                        |
| $\mu$ /mm <sup>-1</sup>                                      | 0.838                                                                        |
| <i>F</i> (000)                                               | 848.0                                                                        |
| Crystal size/mm <sup>3</sup>                                 | 0.2 × 0.2 × 0.15                                                             |
| Radiation                                                    | CuK $\alpha$ ( $\lambda = 1.54184$ )                                         |
| 2 $\theta$ range for data collection/°                       | 8.632 to 143.812                                                             |
| Index ranges                                                 | -23 ≤ <i>h</i> ≤ 25, -10 ≤ <i>k</i> ≤ 10, -12 ≤ <i>l</i> ≤ 6                 |
| Reflections collected                                        | 12879                                                                        |
| Independent reflections                                      | 3699 [ <i>R</i> <sub>int</sub> = 0.0341, <i>R</i> <sub>sigma</sub> = 0.0301] |
| Data/restraints/parameters                                   | 3699/0/273                                                                   |
| Goodness-of-fit on <i>F</i> <sup>2</sup>                     | 1.027                                                                        |
| Final <i>R</i> indexes [ <i>I</i> ≥ 2 $\sigma$ ( <i>I</i> )] | <i>R</i> <sub>1</sub> = 0.0383, <i>wR</i> <sub>2</sub> = 0.0939              |
| Final <i>R</i> indexes [all data]                            | <i>R</i> <sub>1</sub> = 0.0476, <i>wR</i> <sub>2</sub> = 0.1007              |
| Largest diff. peak/hole / e Å <sup>-3</sup>                  | 0.29/-0.29                                                                   |

Crystals of compound **7a** were obtained by slow evaporation of a solution of **7a** in dichloromethane and *n*-hexane. Single crystal X-ray diffraction intensity data of compound **7a** was collected on a 'XtaLAB Synergy R, DW system, HyPix' diffractometer equipped with graphite monochromatized CuK $\alpha$  ( $\lambda = 1.54184$  Å) at 100 K. The structure was solved by the program ShelXT (Sheldrick, 2015) and refined with the program ShelXL (Sheldrick, 2015). The crystal data and structure refinement results for compound **7a** are listed in the Table S4.

**Table S4.** Crystal data and structure refinement for **7a** (CCDC 1919079).

|                                                              |                                                                              |
|--------------------------------------------------------------|------------------------------------------------------------------------------|
| Identification code                                          | 20190305a                                                                    |
| Empirical formula                                            | C <sub>22</sub> H <sub>18</sub> O <sub>5</sub>                               |
| Formula weight                                               | 362.36                                                                       |
| Temperature/K                                                | 100.00(10)                                                                   |
| Crystal system                                               | monoclinic                                                                   |
| Space group                                                  | P2 <sub>1</sub> /c                                                           |
| <i>a</i> /Å                                                  | 16.8387(4)                                                                   |
| <i>b</i> /Å                                                  | 6.7800(2)                                                                    |
| <i>c</i> /Å                                                  | 15.4079(4)                                                                   |
| $\alpha$ /°                                                  | 90                                                                           |
| $\beta$ /°                                                   | 106.205(3)                                                                   |
| $\gamma$ /°                                                  | 90                                                                           |
| Volume/Å <sup>3</sup>                                        | 1689.17(8)                                                                   |
| <i>Z</i>                                                     | 4                                                                            |
| $\rho_{\text{calc}}$ (g/cm <sup>3</sup> )                    | 1.425                                                                        |
| $\mu$ /mm <sup>-1</sup>                                      | 0.831                                                                        |
| <i>F</i> (000)                                               | 760.0                                                                        |
| Crystal size/mm <sup>3</sup>                                 | 0.3 × 0.08 × 0.05                                                            |
| Radiation                                                    | CuK $\alpha$ ( $\lambda = 1.54184$ )                                         |
| 2 $\theta$ range for data collection/°                       | 5.466 to 150.914                                                             |
| Index ranges                                                 | -21 ≤ <i>h</i> ≤ 21, -5 ≤ <i>k</i> ≤ 8, -19 ≤ <i>l</i> ≤ 17                  |
| Reflections collected                                        | 11399                                                                        |
| Independent reflections                                      | 3382 [ <i>R</i> <sub>int</sub> = 0.0444, <i>R</i> <sub>sigma</sub> = 0.0435] |
| Data/restraints/parameters                                   | 3382/0/245                                                                   |
| Goodness-of-fit on <i>F</i> <sup>2</sup>                     | 1.077                                                                        |
| Final <i>R</i> indexes [ <i>I</i> ≥ 2 $\sigma$ ( <i>I</i> )] | <i>R</i> <sub>1</sub> = 0.0460, <i>wR</i> <sub>2</sub> = 0.1211              |
| Final <i>R</i> indexes [all data]                            | <i>R</i> <sub>1</sub> = 0.0557, <i>wR</i> <sub>2</sub> = 0.1291              |
| Largest diff. peak/hole / e Å <sup>-3</sup>                  | 0.26/-0.29                                                                   |

Crystals of compound **8a** were obtained by slow evaporation of a solution of **8a** in acetone and *n*-hexane. Single crystal X-ray diffraction intensity data of compound **8a** was collected on a 'XtaLAB Synergy R, DW system, HyPix' diffractometer equipped with graphite monochromatized CuK $\alpha$  ( $\lambda = 1.54184$  Å) at 100 K. The structure was solved by the program ShelXT (Sheldrick, 2015) and refined with the program ShelXL (Sheldrick, 2015). The crystal data and structure refinement results for compound **8a** are listed in the Table S5.

**Table S5.** Crystal data and structure refinement for **8a** (CCDC 1919096).

|                                                      |                                                                              |
|------------------------------------------------------|------------------------------------------------------------------------------|
| Identification code                                  | 20190520c                                                                    |
| Empirical formula                                    | C <sub>22</sub> H <sub>18</sub> O <sub>6</sub>                               |
| Formula weight                                       | 378.36                                                                       |
| Temperature/K                                        | 100.00(10)                                                                   |
| Crystal system                                       | monoclinic                                                                   |
| Space group                                          | P2 <sub>1</sub> /c                                                           |
| <i>a</i> /Å                                          | 8.10270(10)                                                                  |
| <i>b</i> /Å                                          | 27.9899(5)                                                                   |
| <i>c</i> /Å                                          | 7.55070(10)                                                                  |
| $\alpha$ /°                                          | 90                                                                           |
| $\beta$ /°                                           | 101.480(2)                                                                   |
| $\gamma$ /°                                          | 90                                                                           |
| Volume/Å <sup>3</sup>                                | 1678.19(4)                                                                   |
| <i>Z</i>                                             | 4                                                                            |
| $\rho_{\text{calc}}$ (g/cm <sup>3</sup> )            | 1.498                                                                        |
| $\mu$ /mm <sup>-1</sup>                              | 0.909                                                                        |
| <i>F</i> (000)                                       | 792.0                                                                        |
| Crystal size/mm <sup>3</sup>                         | 0.12 × 0.1 × 0.08                                                            |
| Radiation                                            | CuK $\alpha$ ( $\lambda = 1.54184$ )                                         |
| 2 $\theta$ range for data collection/°               | 6.316 to 151.45                                                              |
| Index ranges                                         | -10 ≤ <i>h</i> ≤ 8, -28 ≤ <i>k</i> ≤ 34, -9 ≤ <i>l</i> ≤ 9                   |
| Reflections collected                                | 10411                                                                        |
| Independent reflections                              | 3318 [ <i>R</i> <sub>int</sub> = 0.0312, <i>R</i> <sub>sigma</sub> = 0.0296] |
| Data/restraints/parameters                           | 3318/0/255                                                                   |
| Goodness-of-fit on <i>F</i> <sup>2</sup>             | 1.074                                                                        |
| Final <i>R</i> indexes [ <i>I</i> ≥ 2σ ( <i>I</i> )] | <i>R</i> <sub>1</sub> = 0.0416, <i>wR</i> <sub>2</sub> = 0.0958              |
| Final <i>R</i> indexes [all data]                    | <i>R</i> <sub>1</sub> = 0.0505, <i>wR</i> <sub>2</sub> = 0.1074              |
| Largest diff. peak/hole / e Å <sup>-3</sup>          | 0.32/-0.32                                                                   |

Crystals of compound **9a** were obtained by slow evaporation of a solution of **9a** in dichloromethane, chloroform and *n*-hexane. Single crystal X-ray diffraction intensity data of compound **9a** was collected on a 'XtaLAB Synergy R, DW system, HyPix' diffractometer equipped with graphite monochromatized CuK $\alpha$  ( $\lambda = 1.54184$  Å) at 100 K. The structure was solved by the program ShelXT (Sheldrick, 2015) and refined with the program ShelXL (Sheldrick, 2015). The crystal data and structure refinement results for compound **9a** are listed in the Table S6.

**Table S6.** Crystal data and structure refinement for **9a** (CCDC 1919100).

|                                                      |                                                                              |
|------------------------------------------------------|------------------------------------------------------------------------------|
| Identification code                                  | 20190514a                                                                    |
| Empirical formula                                    | C <sub>24</sub> H <sub>22</sub> O <sub>7</sub>                               |
| Formula weight                                       | 422.41                                                                       |
| Temperature/K                                        | 100.00(10)                                                                   |
| Crystal system                                       | orthorhombic                                                                 |
| Space group                                          | Pca2 <sub>1</sub>                                                            |
| <i>a</i> /Å                                          | 14.0881(2)                                                                   |
| <i>b</i> /Å                                          | 7.88590(10)                                                                  |
| <i>c</i> /Å                                          | 35.7414(4)                                                                   |
| $\alpha$ /°                                          | 90                                                                           |
| $\beta$ /°                                           | 90                                                                           |
| $\gamma$ /°                                          | 90                                                                           |
| Volume/Å <sup>3</sup>                                | 3970.78(9)                                                                   |
| <i>Z</i>                                             | 8                                                                            |
| $\rho_{\text{calc}}$ /cm <sup>3</sup>                | 1.413                                                                        |
| $\mu$ /mm <sup>-1</sup>                              | 0.866                                                                        |
| <i>F</i> (000)                                       | 1776.0                                                                       |
| Crystal size/mm <sup>3</sup>                         | 0.3 × 0.2 × 0.1                                                              |
| Radiation                                            | CuK $\alpha$ ( $\lambda = 1.54184$ )                                         |
| 2 $\theta$ range for data collection/°               | 4.944 to 151.126                                                             |
| Index ranges                                         | -17 ≤ <i>h</i> ≤ 17, -9 ≤ <i>k</i> ≤ 9, -44 ≤ <i>l</i> ≤ 44                  |
| Reflections collected                                | 27953                                                                        |
| Independent reflections                              | 7424 [ <i>R</i> <sub>int</sub> = 0.0279, <i>R</i> <sub>sigma</sub> = 0.0220] |
| Data/restraints/parameters                           | 7424/1/567                                                                   |
| Goodness-of-fit on <i>F</i> <sup>2</sup>             | 1.021                                                                        |
| Final <i>R</i> indexes [ <i>I</i> ≥ 2σ ( <i>I</i> )] | <i>R</i> <sub>1</sub> = 0.0303, <i>wR</i> <sub>2</sub> = 0.0770              |
| Final <i>R</i> indexes [all data]                    | <i>R</i> <sub>1</sub> = 0.0315, <i>wR</i> <sub>2</sub> = 0.0786              |
| Largest diff. peak/hole / e Å <sup>-3</sup>          | 0.23/-0.20                                                                   |



### 3. NMR spectra of reactants 1 and products 3-9.

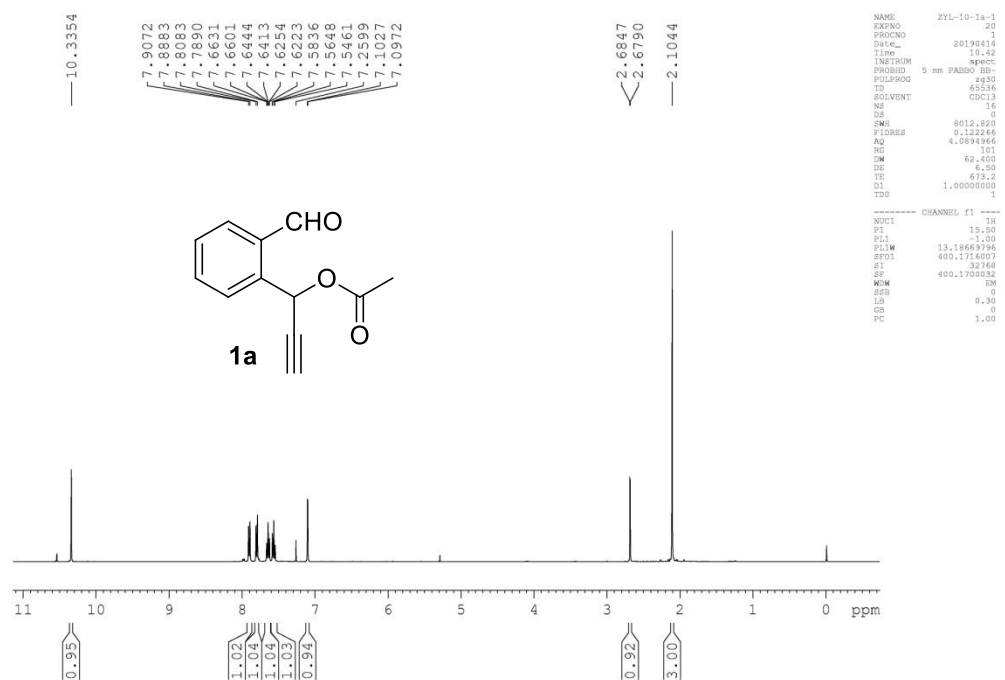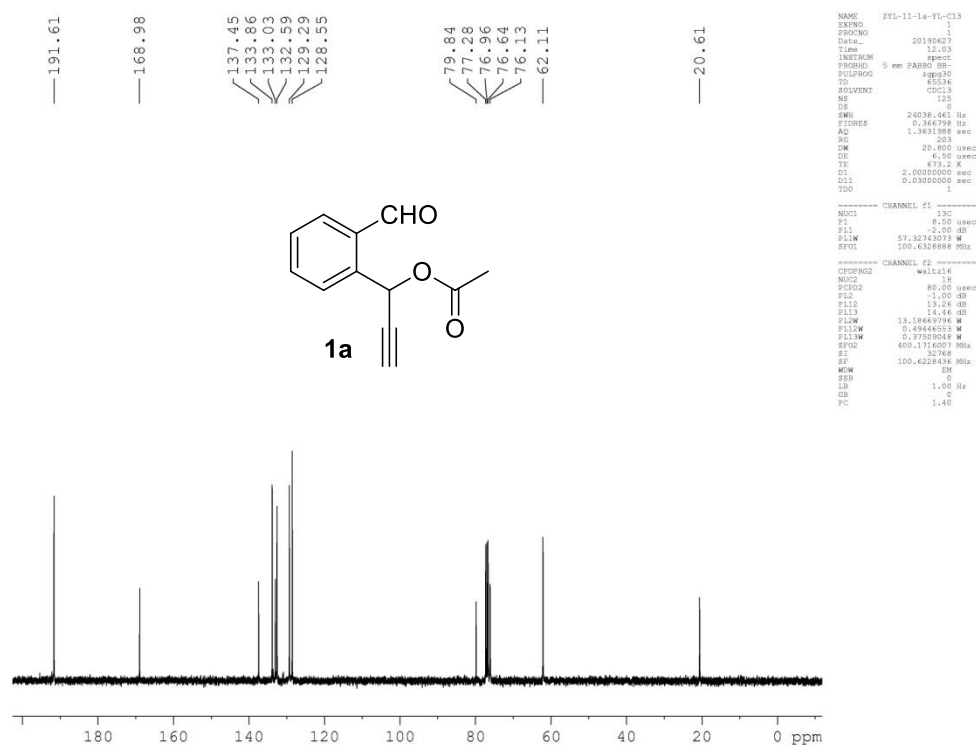

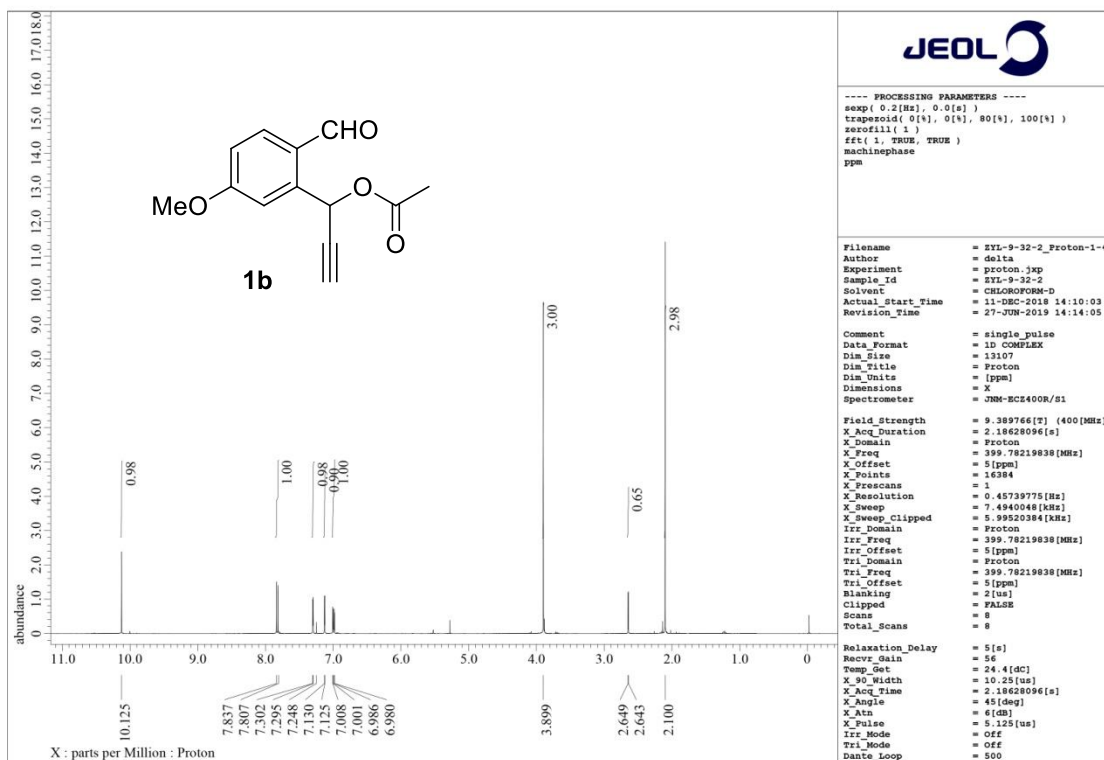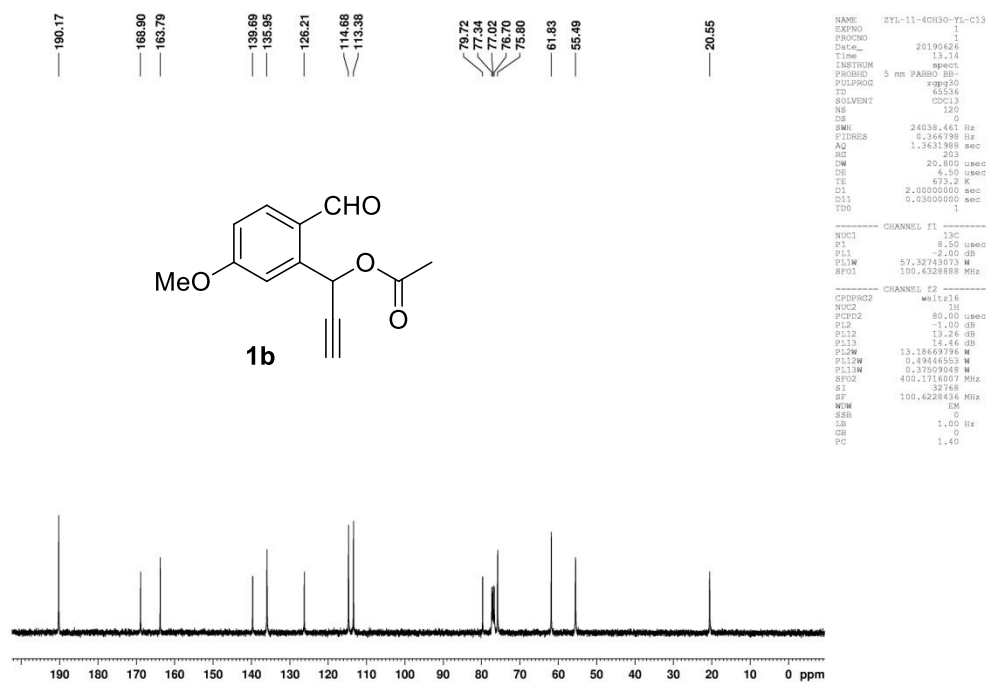

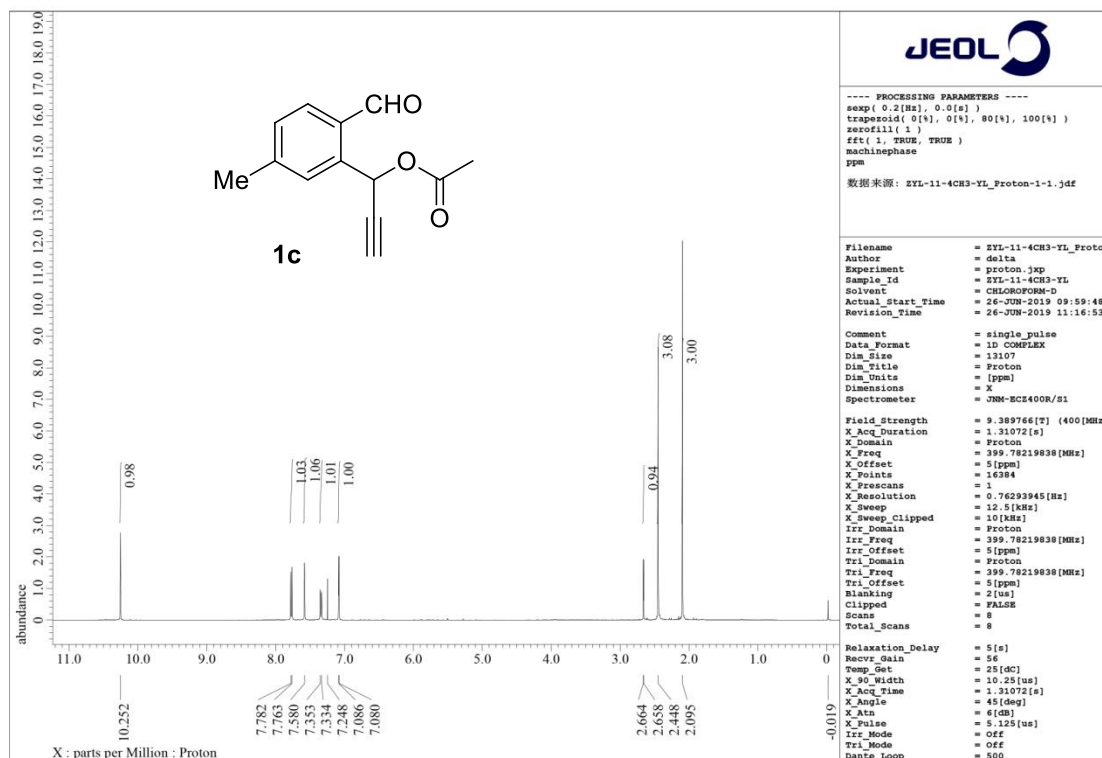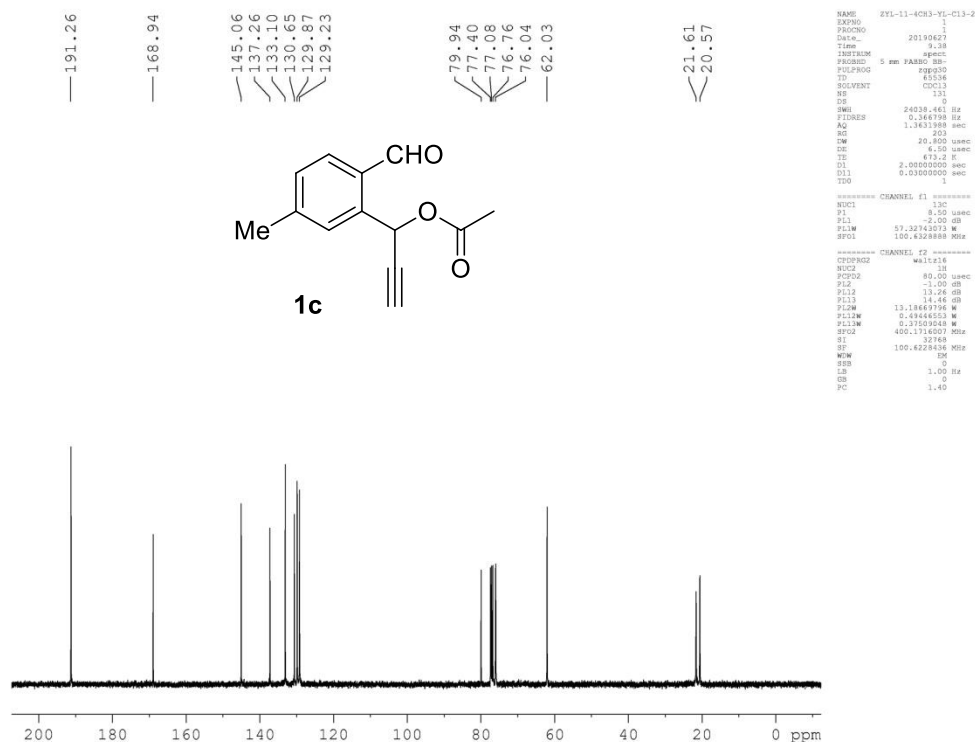

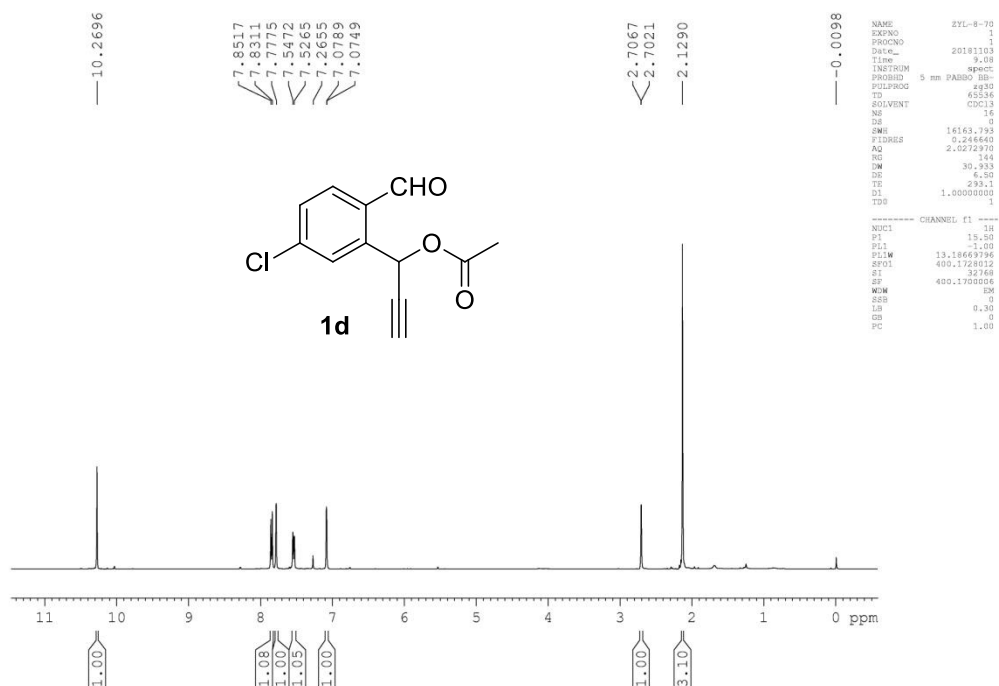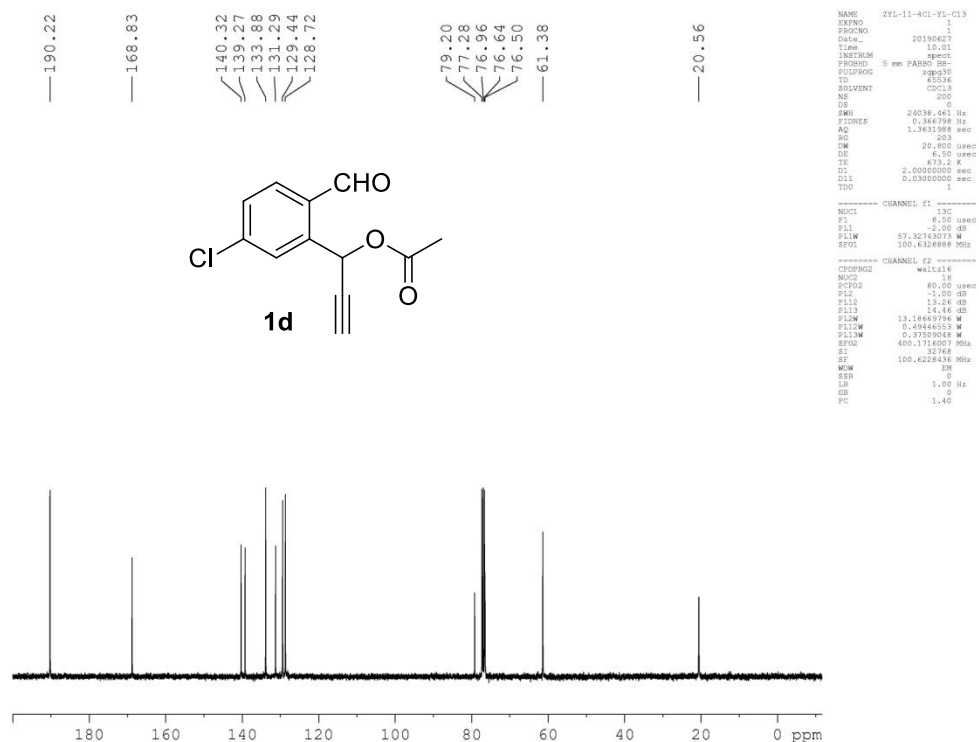

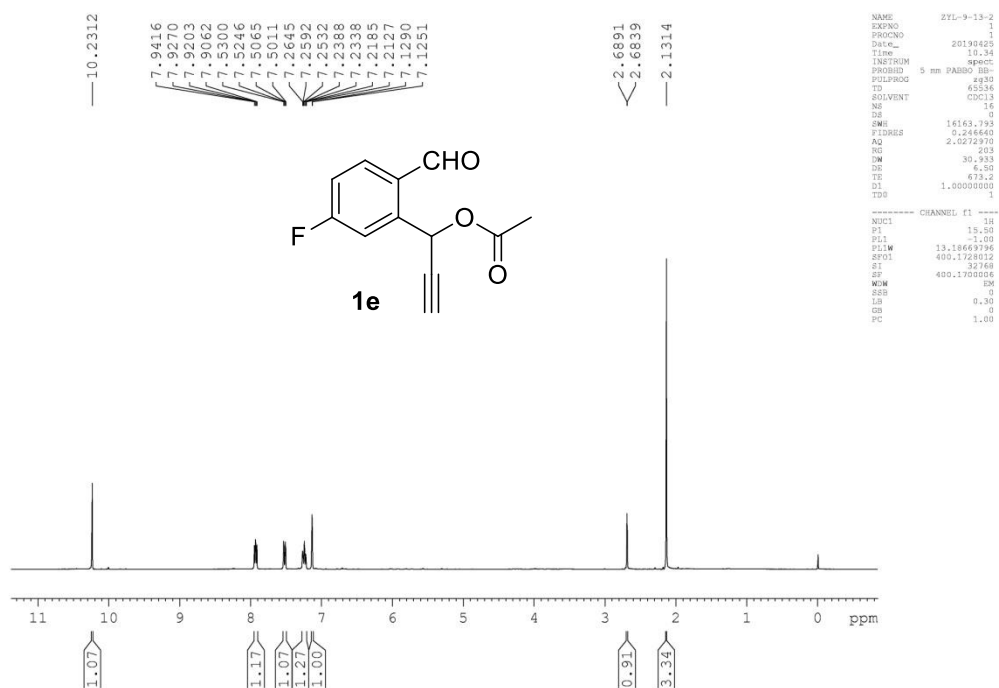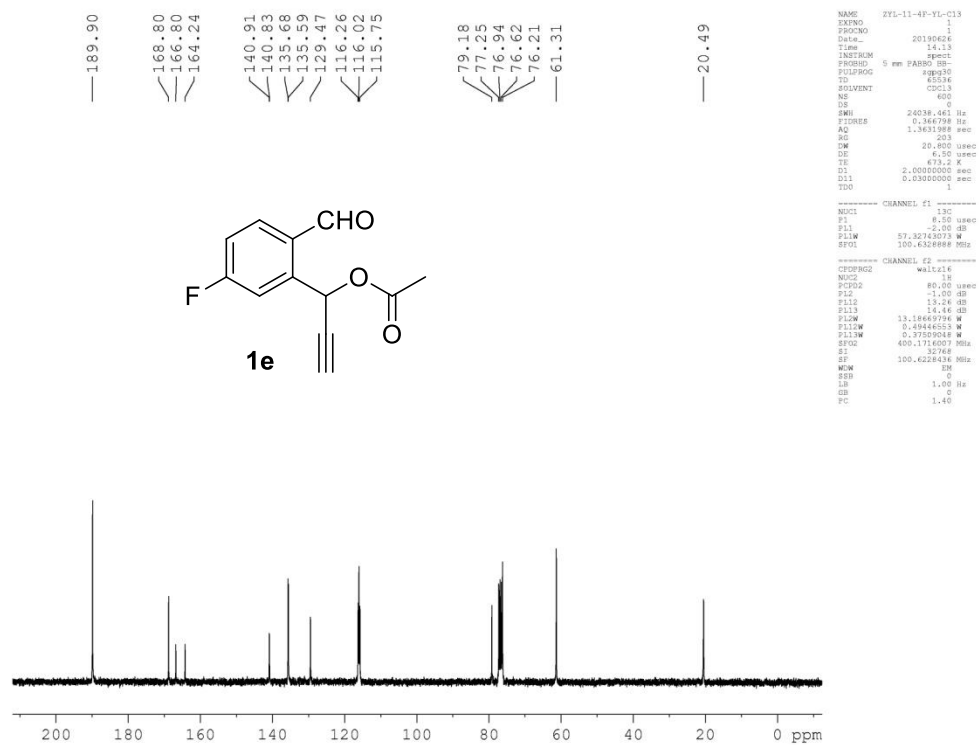

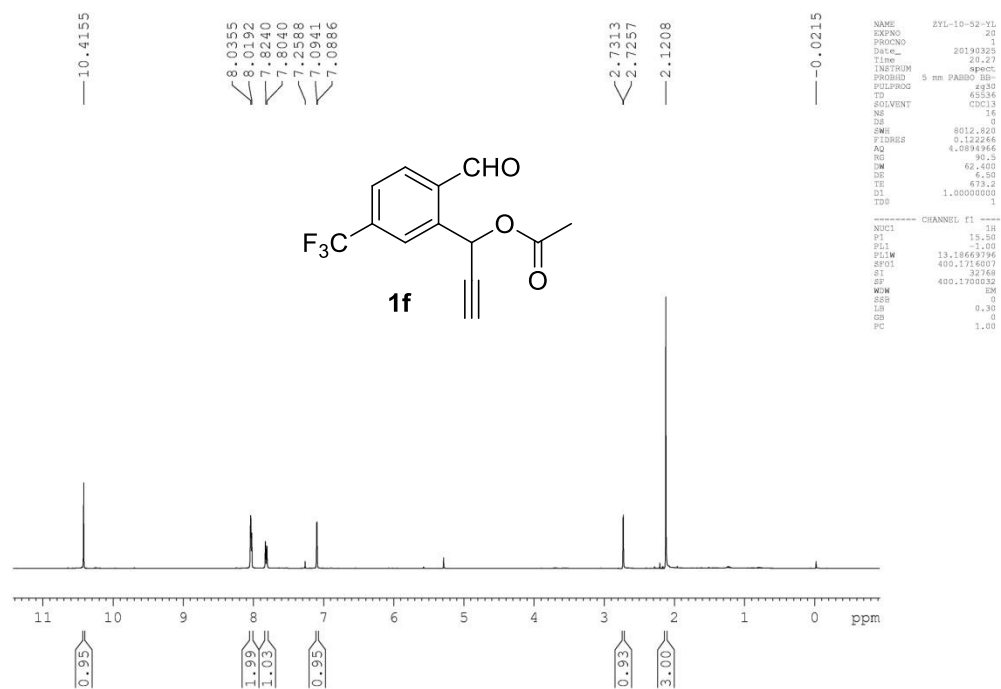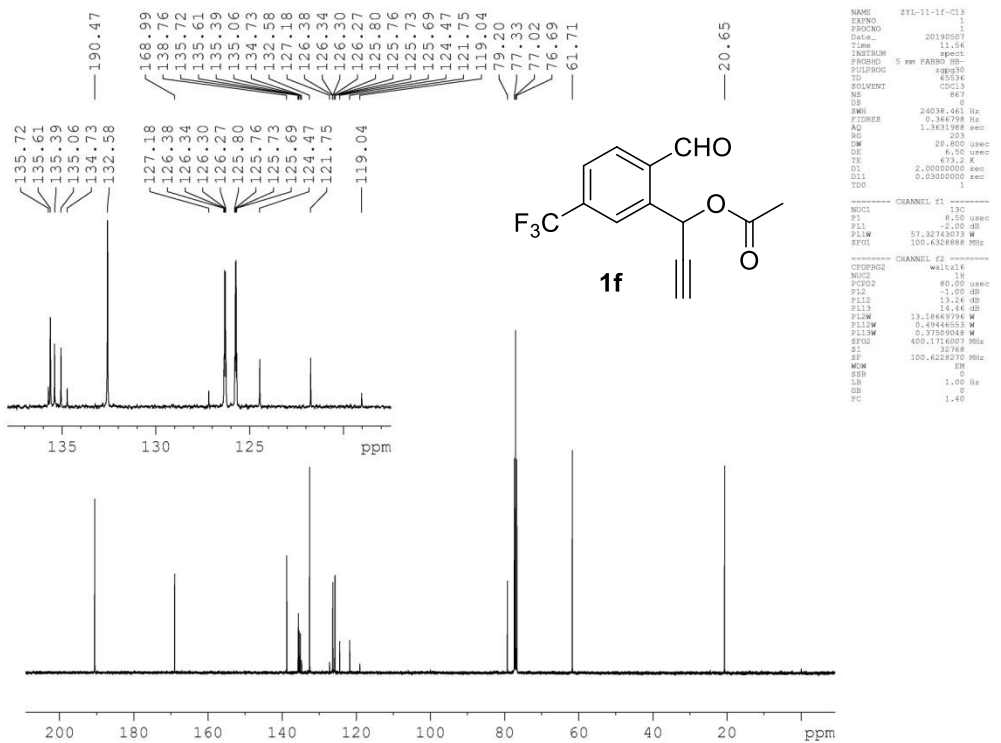

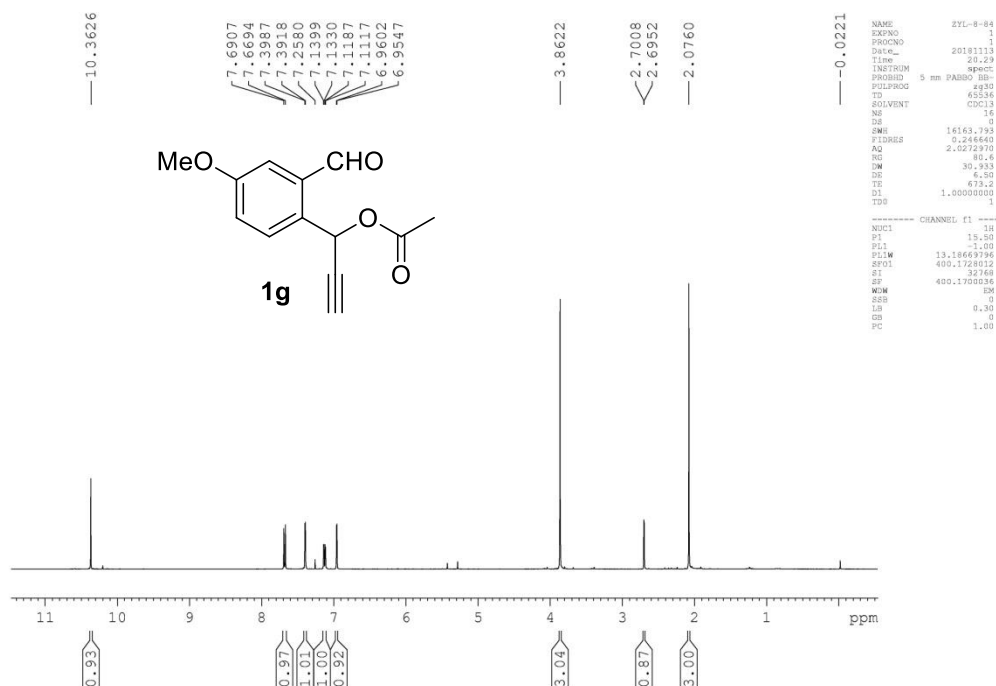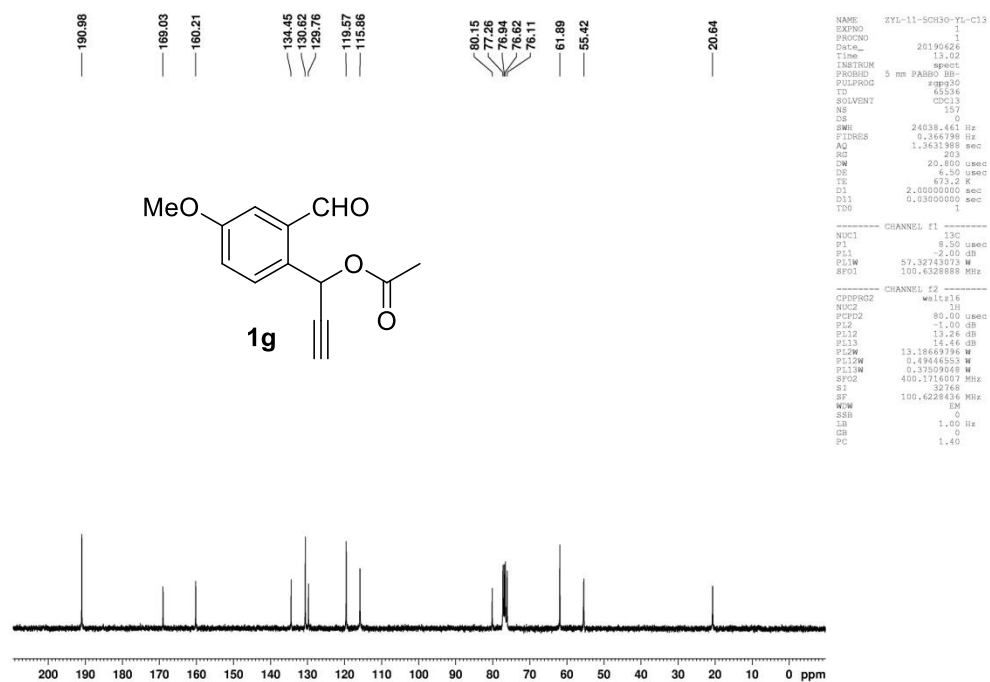

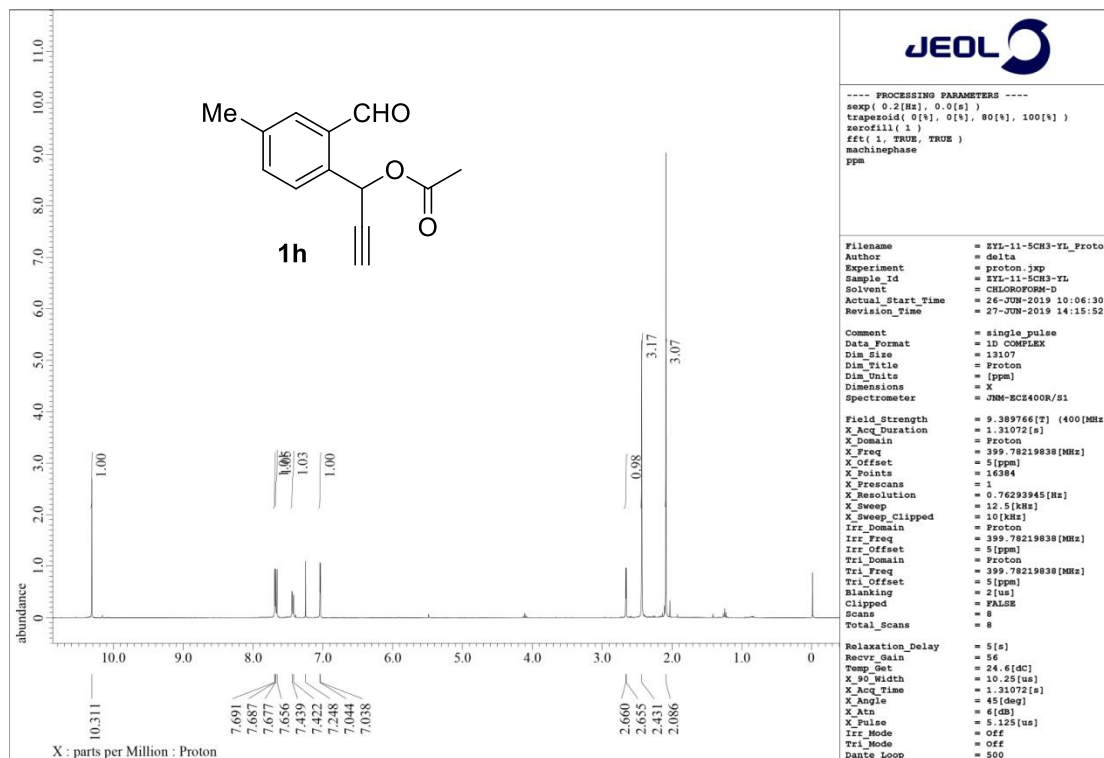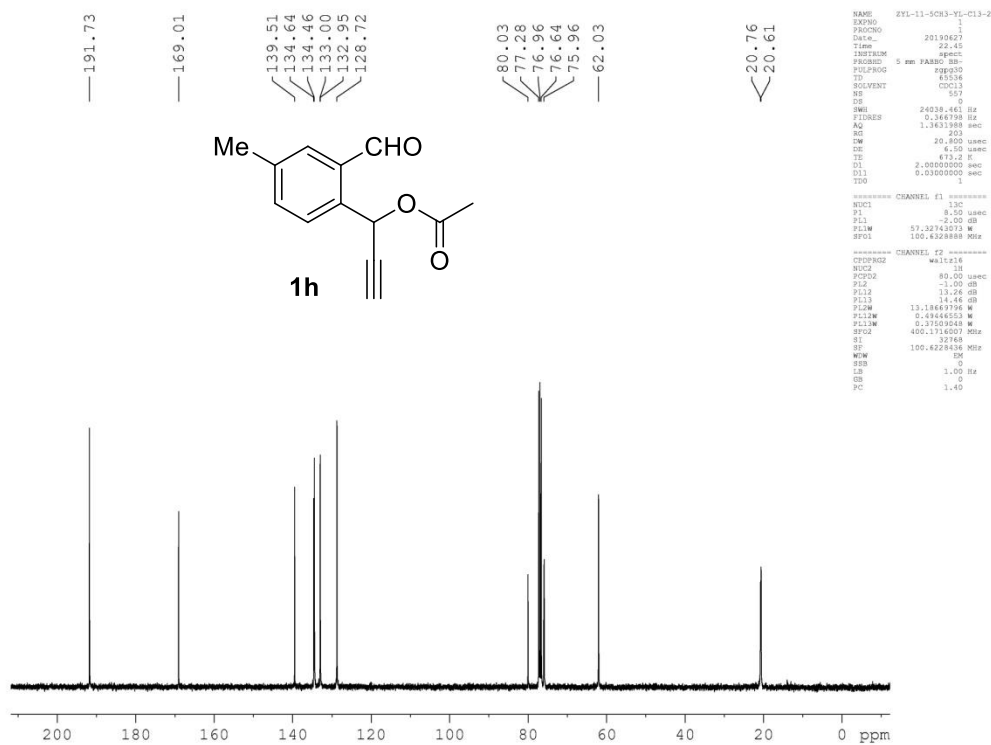



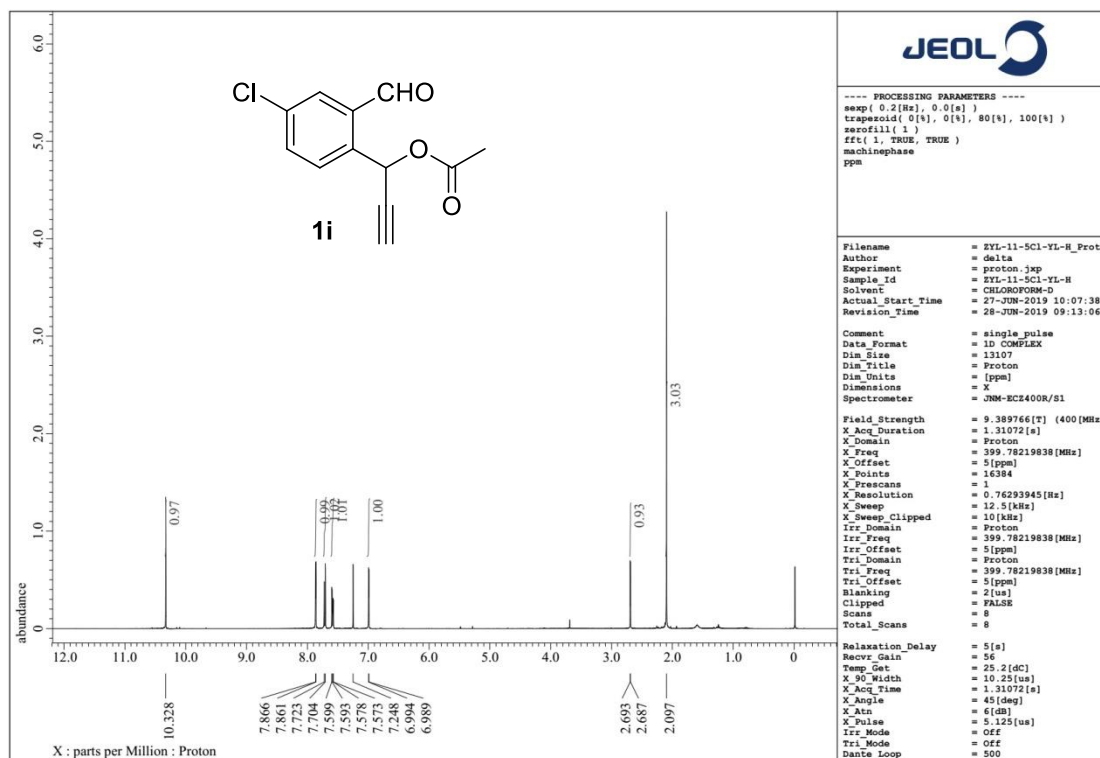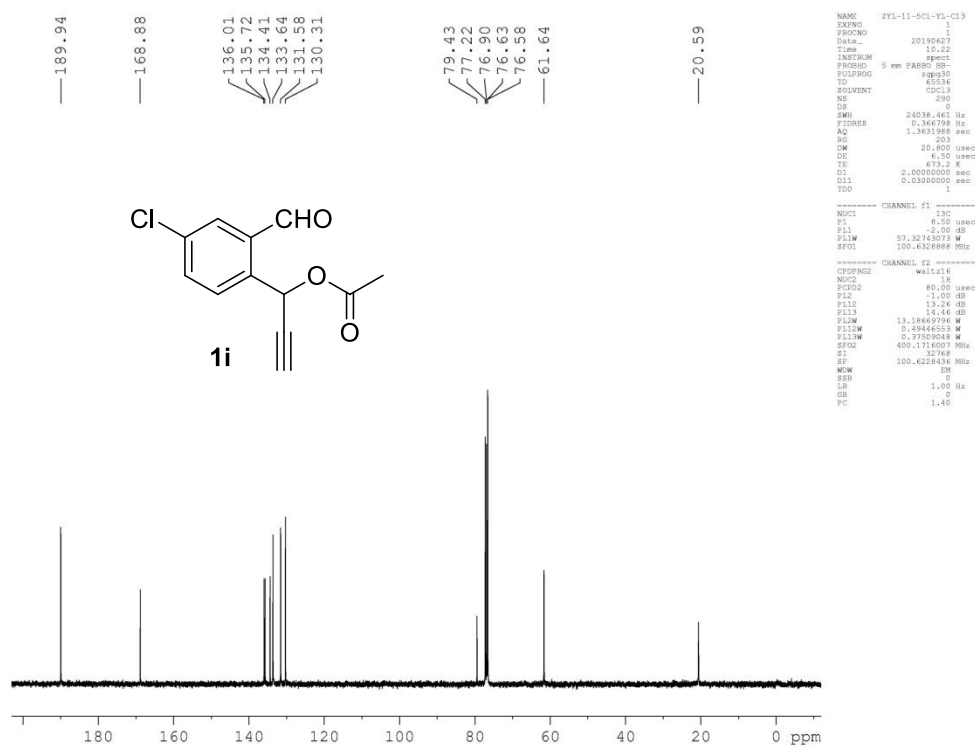

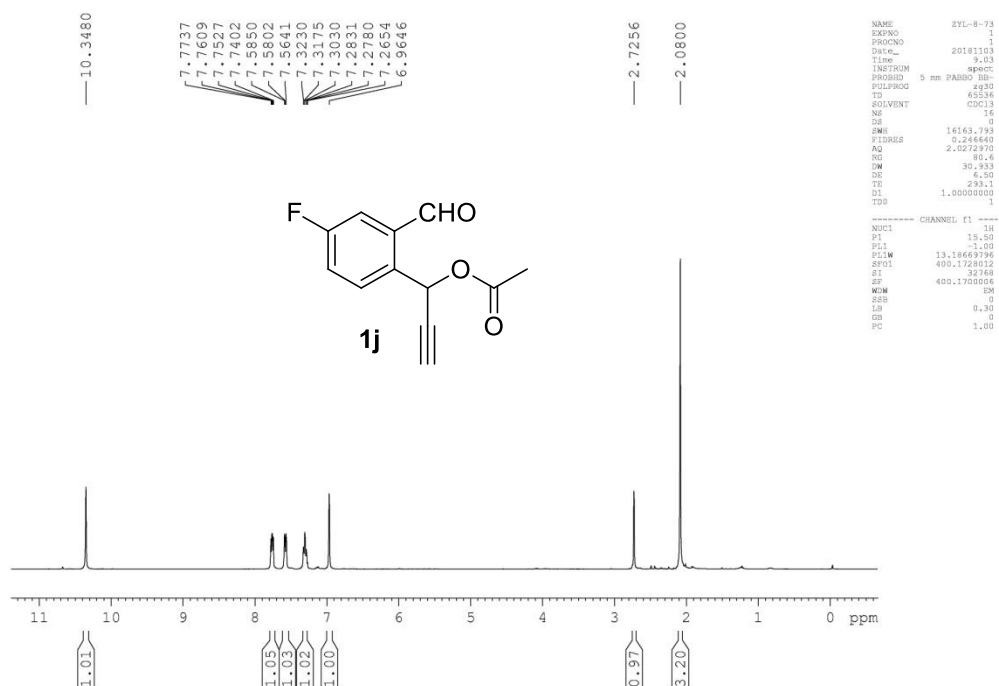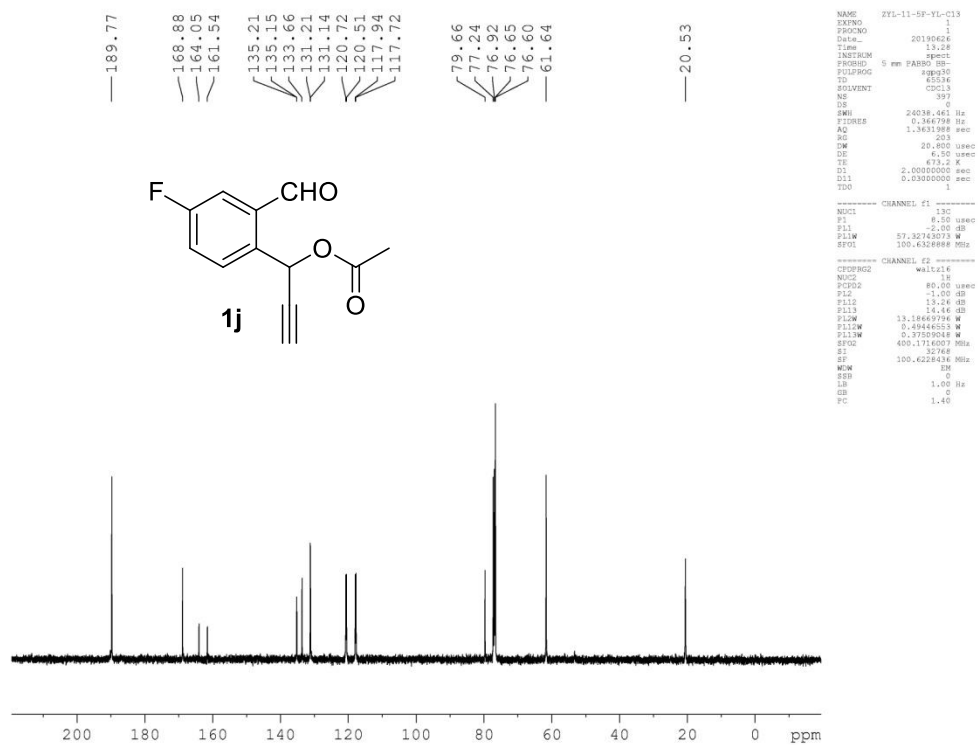

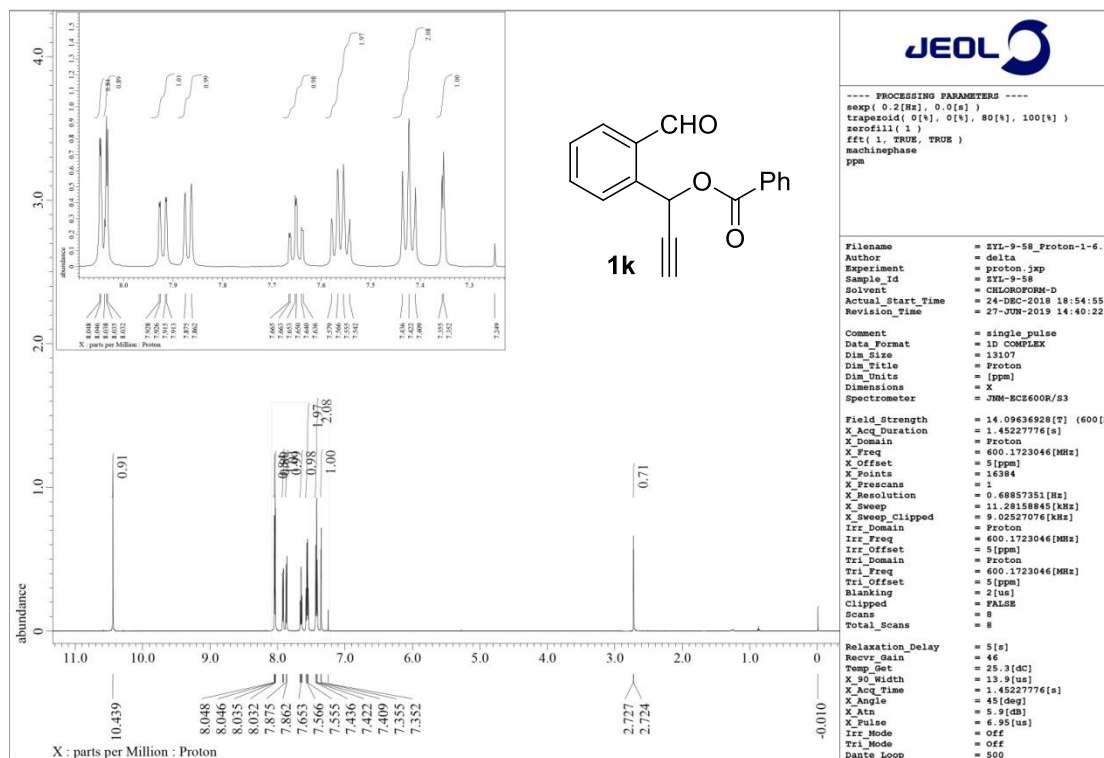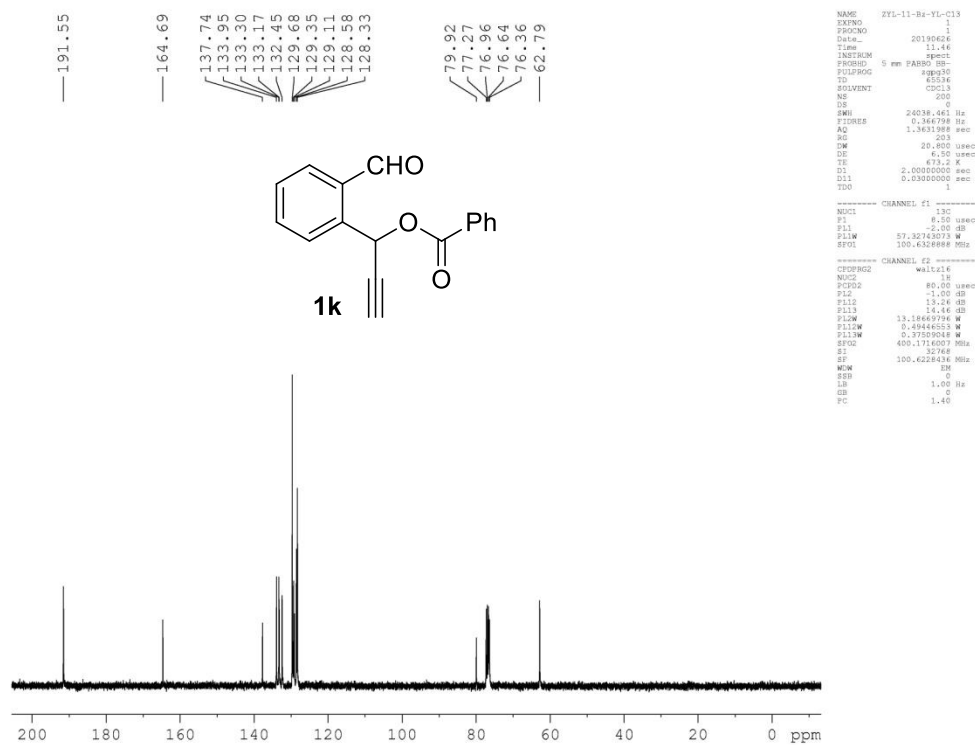

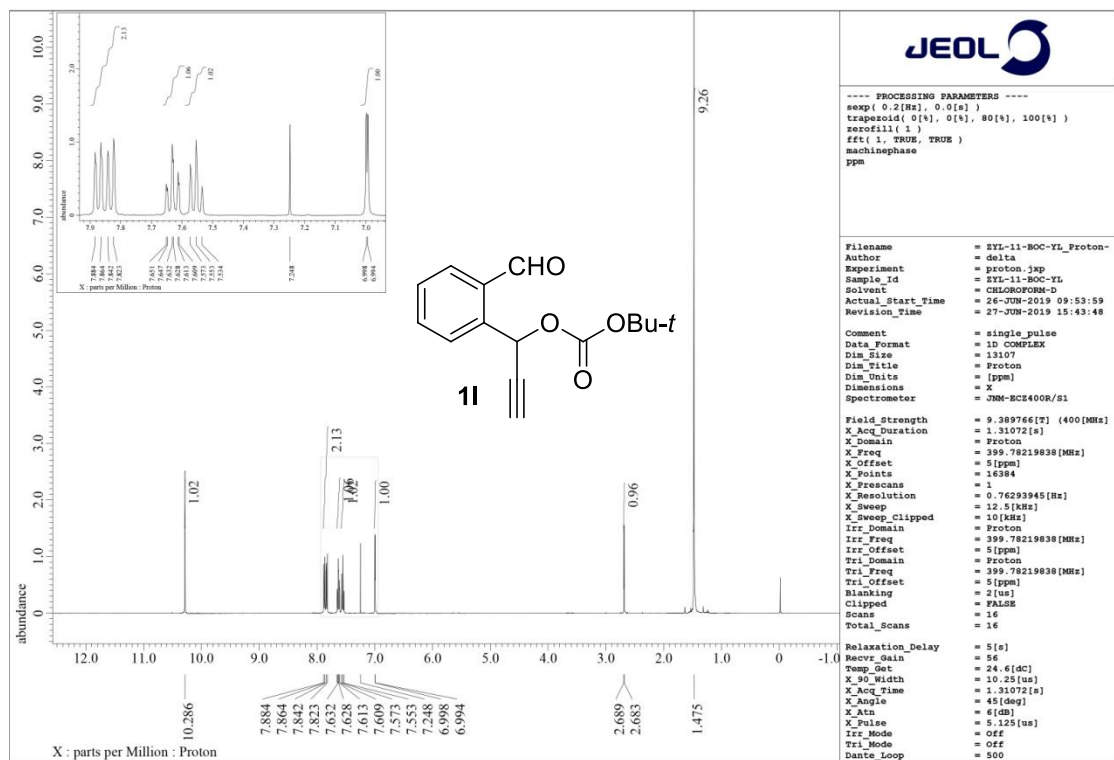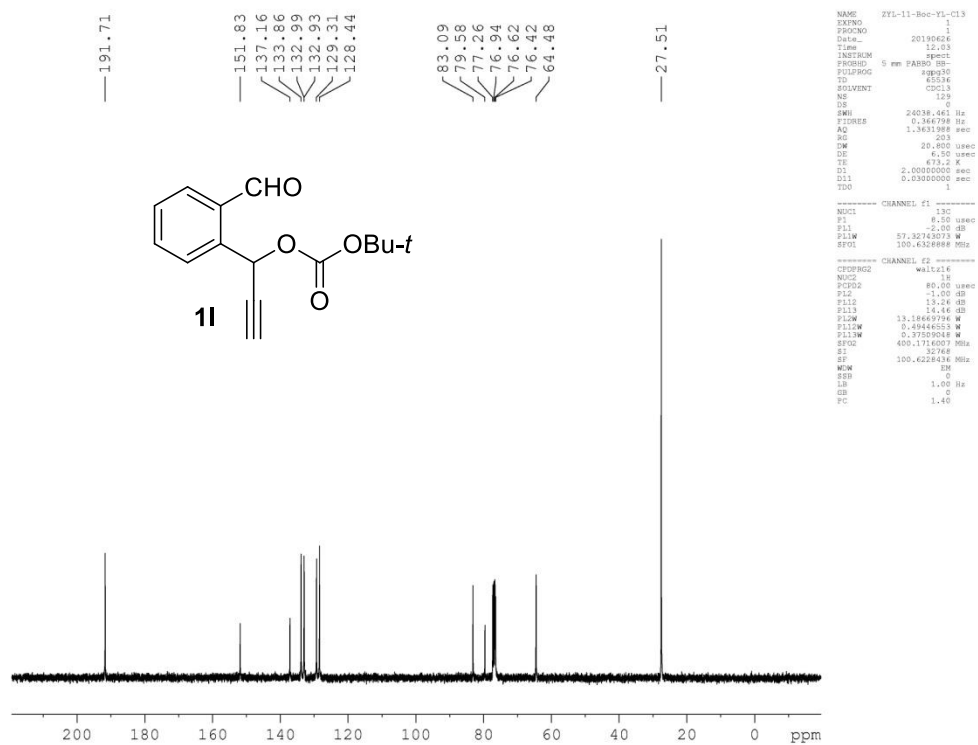

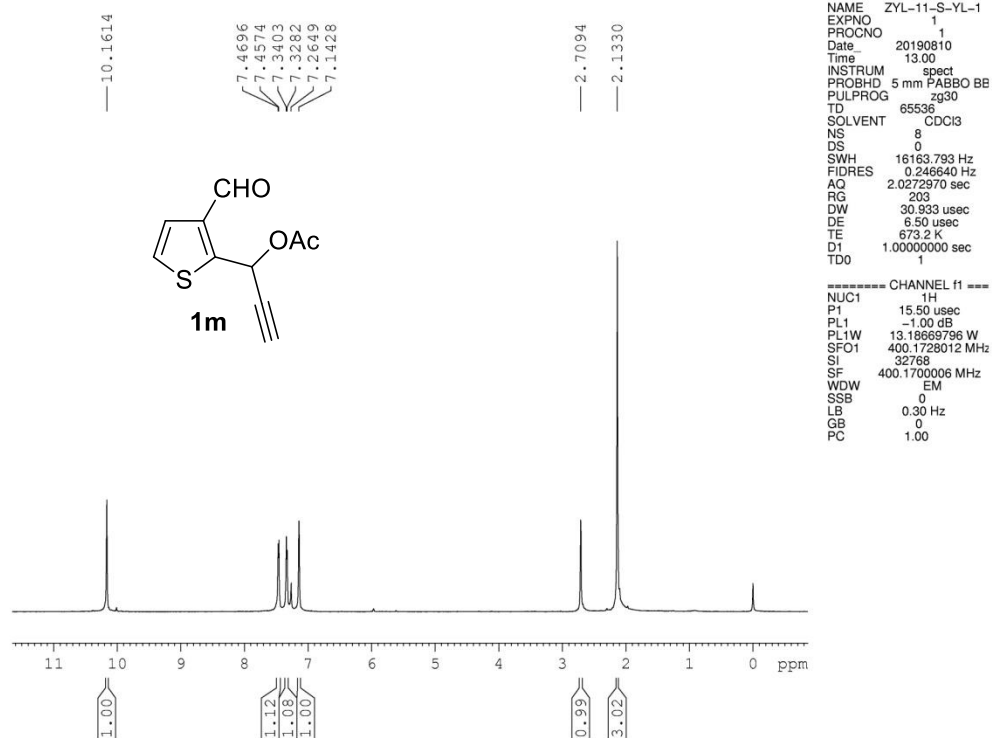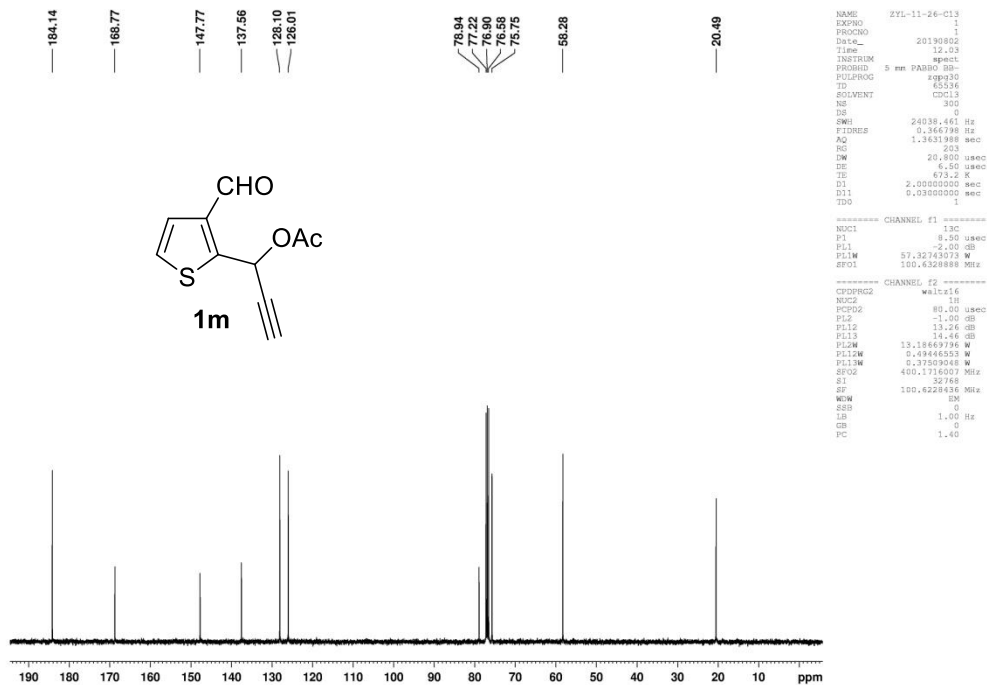

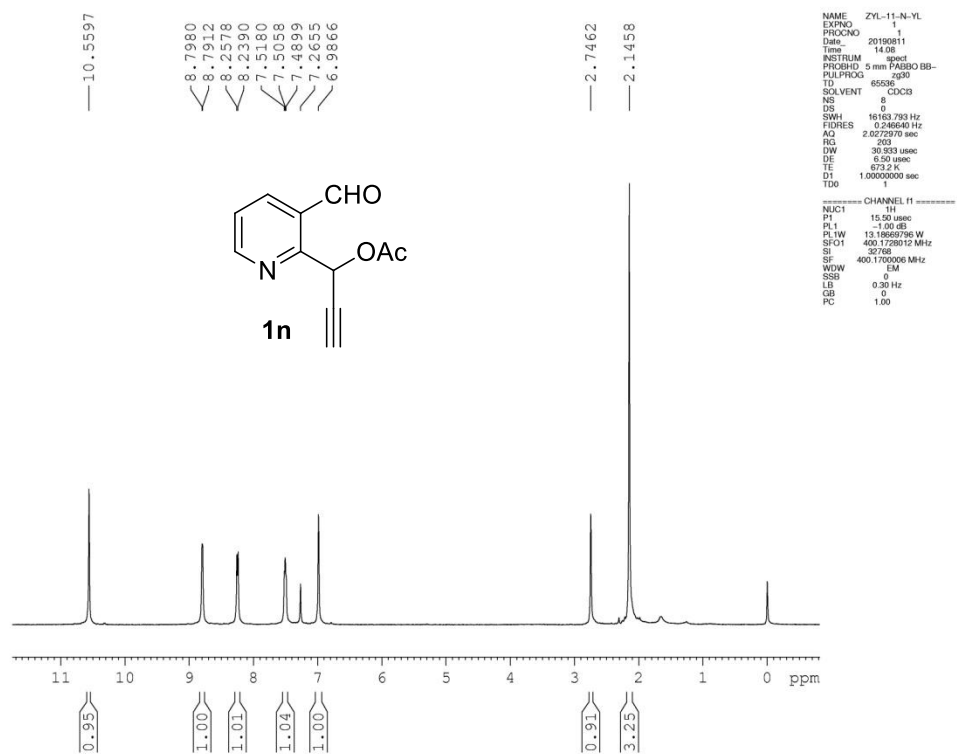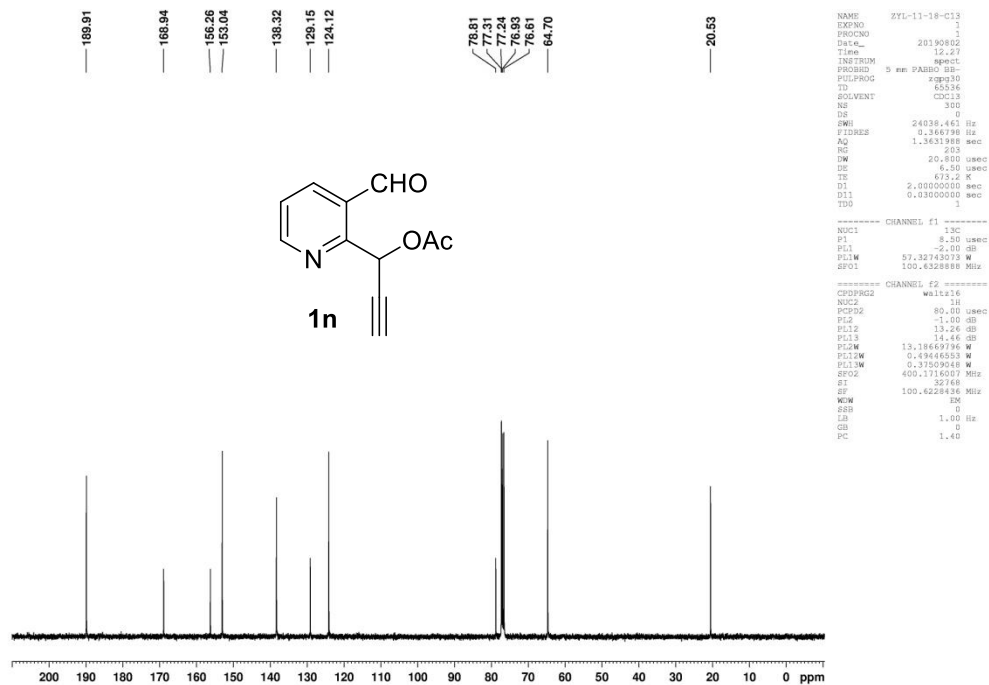

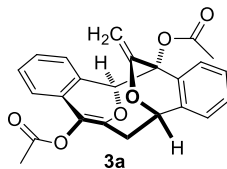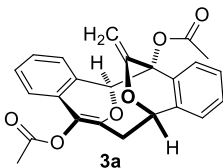

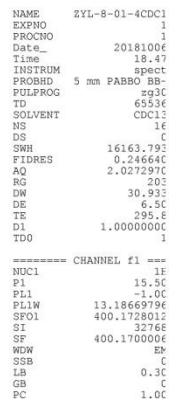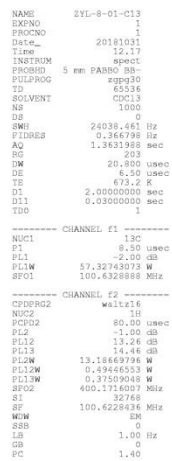



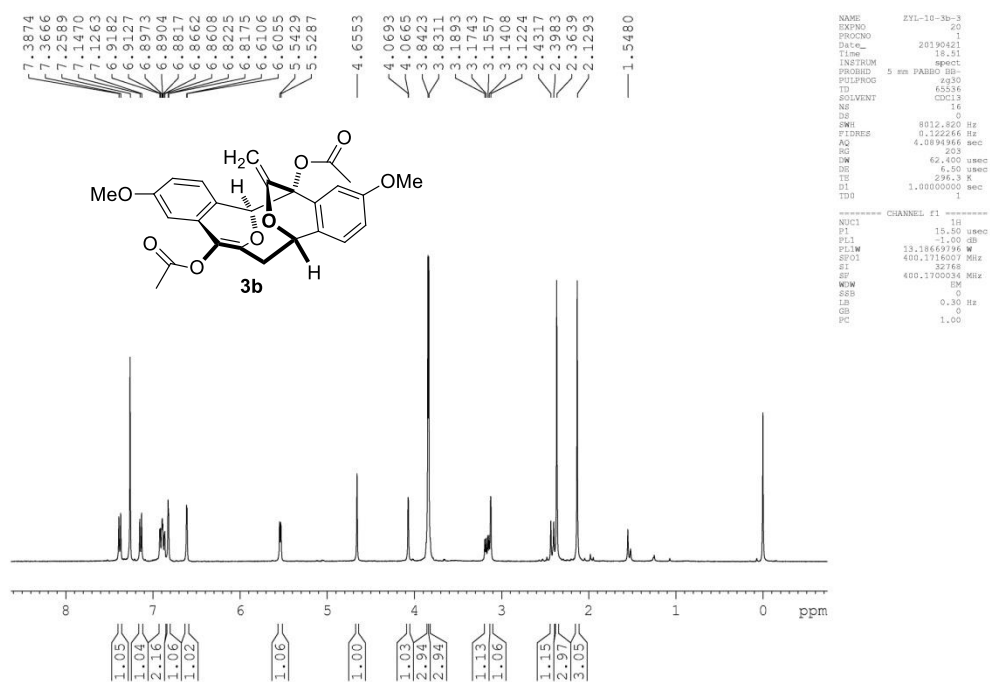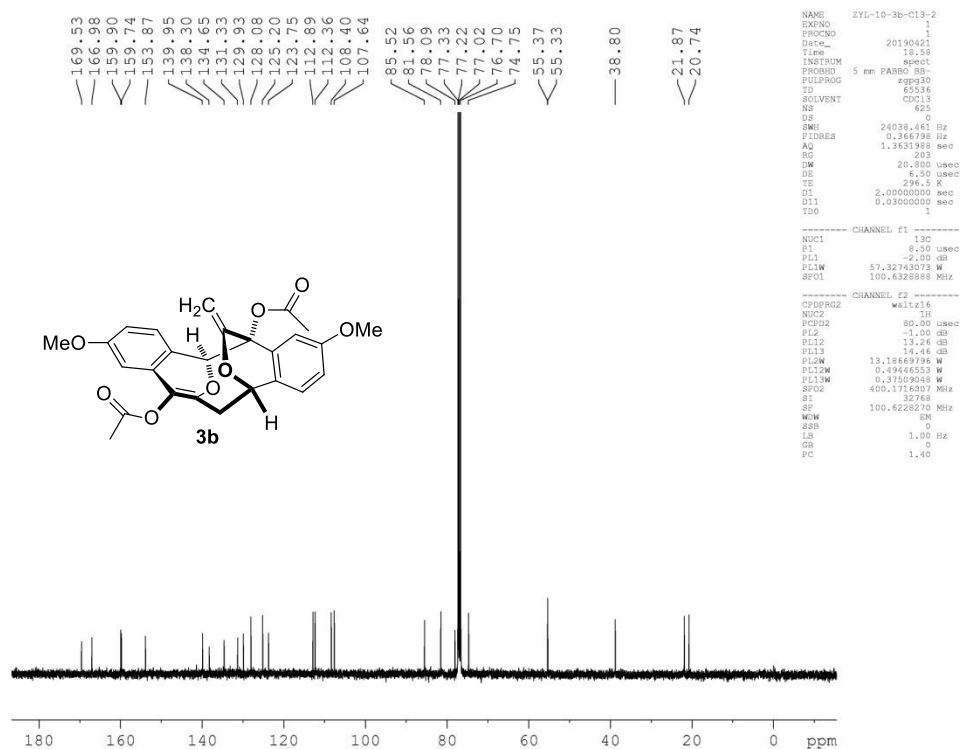

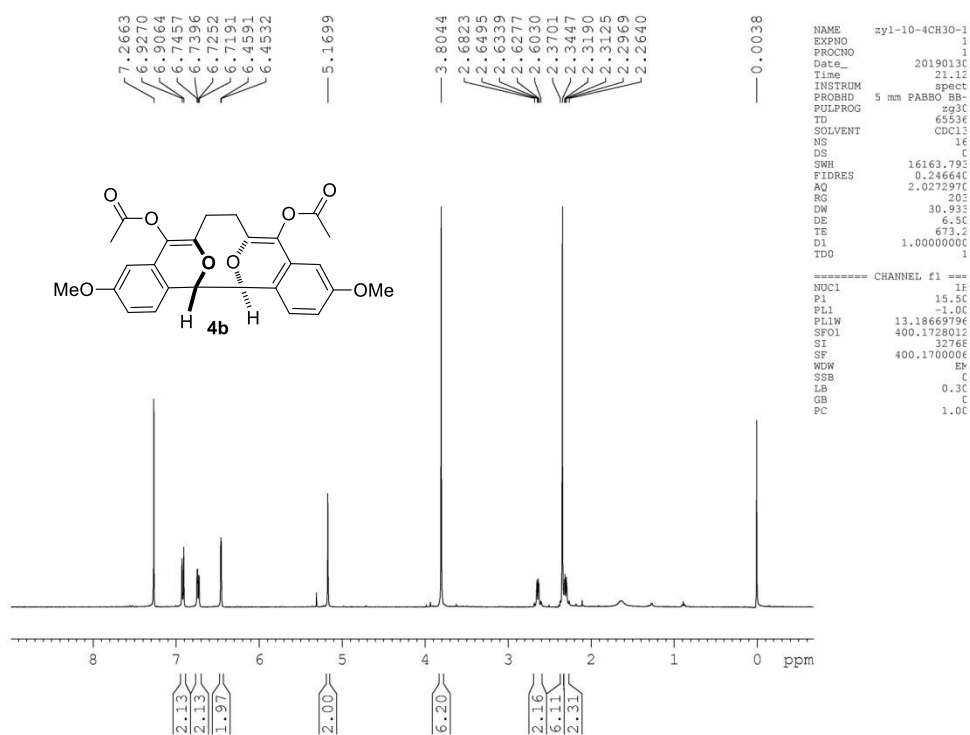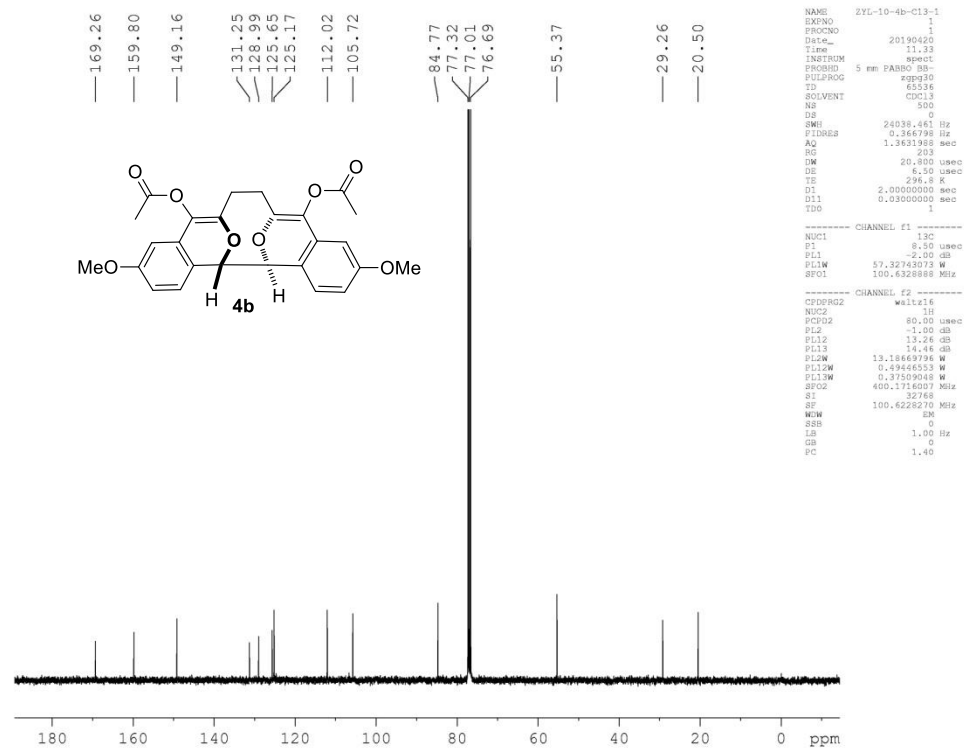







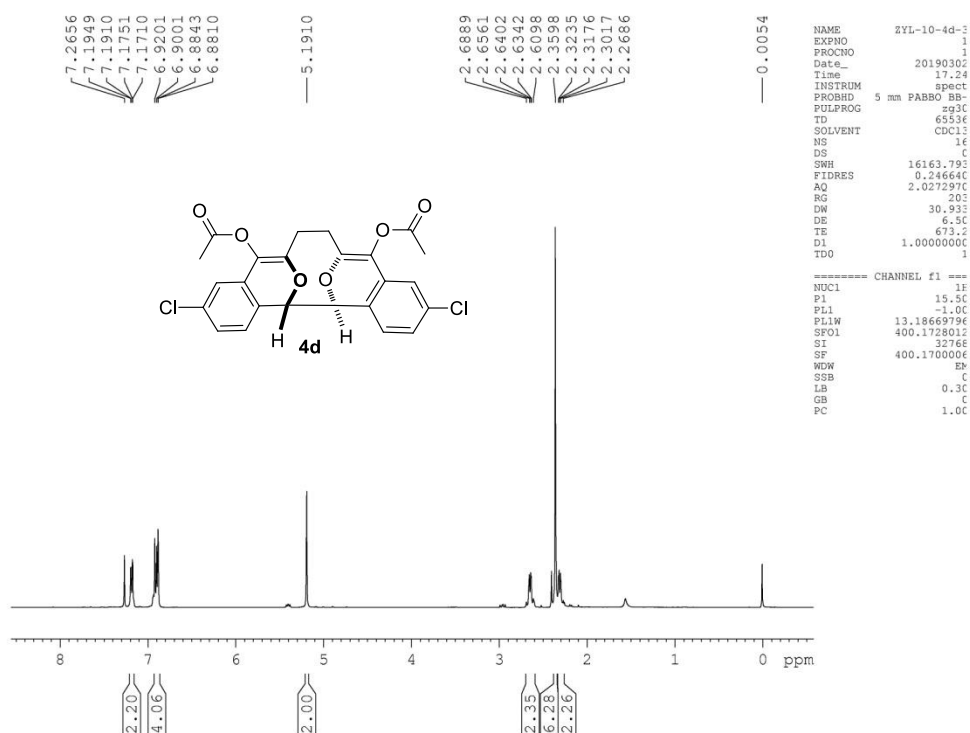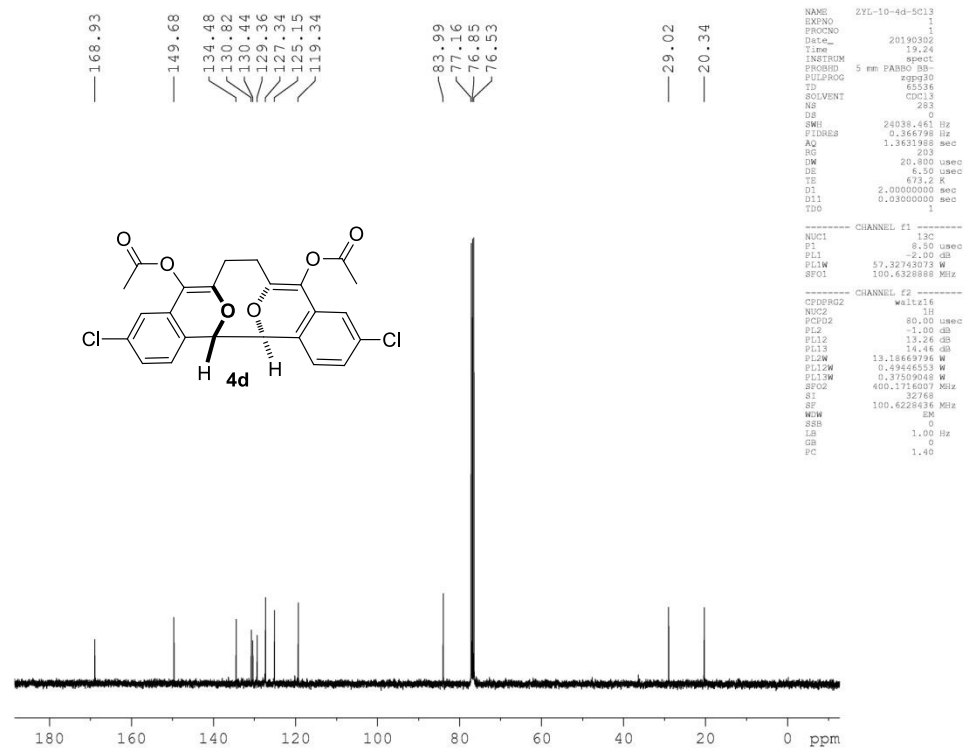



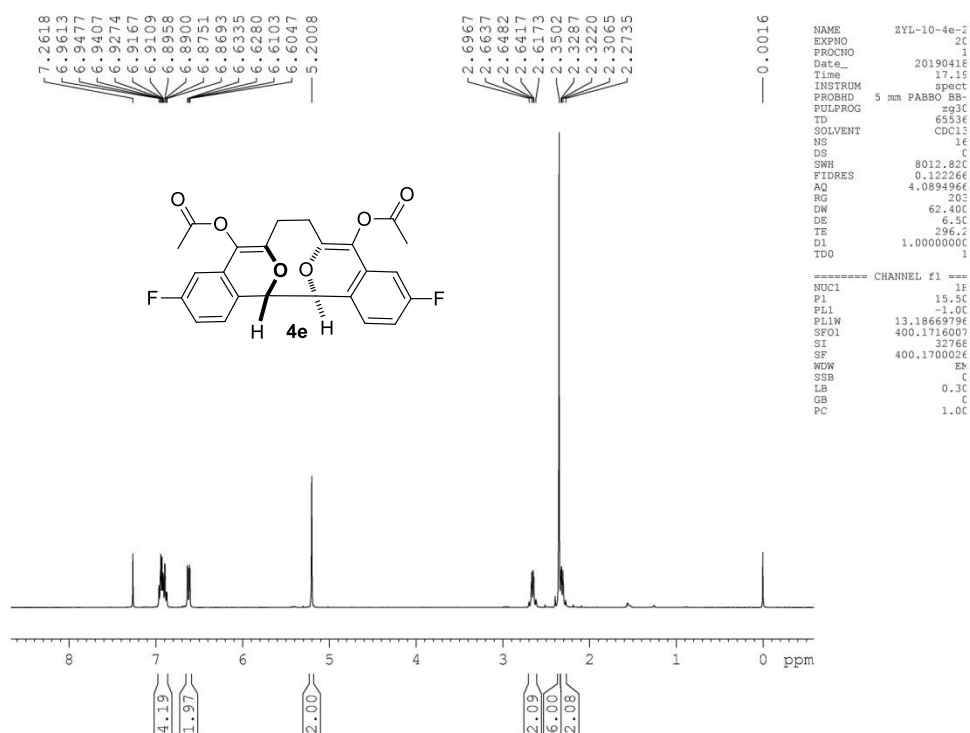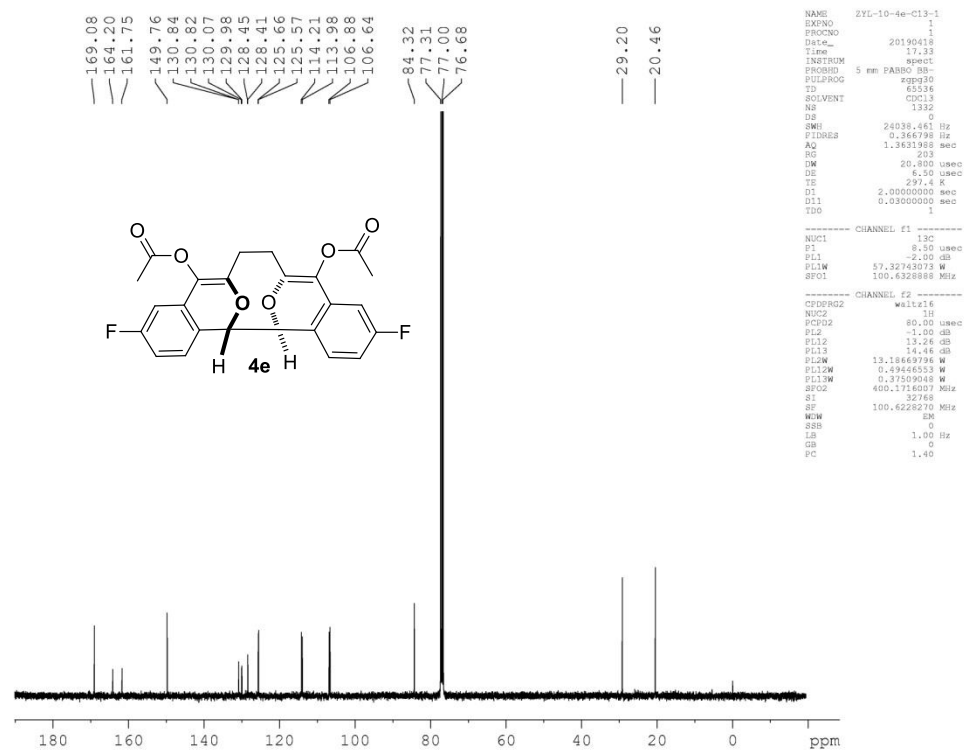



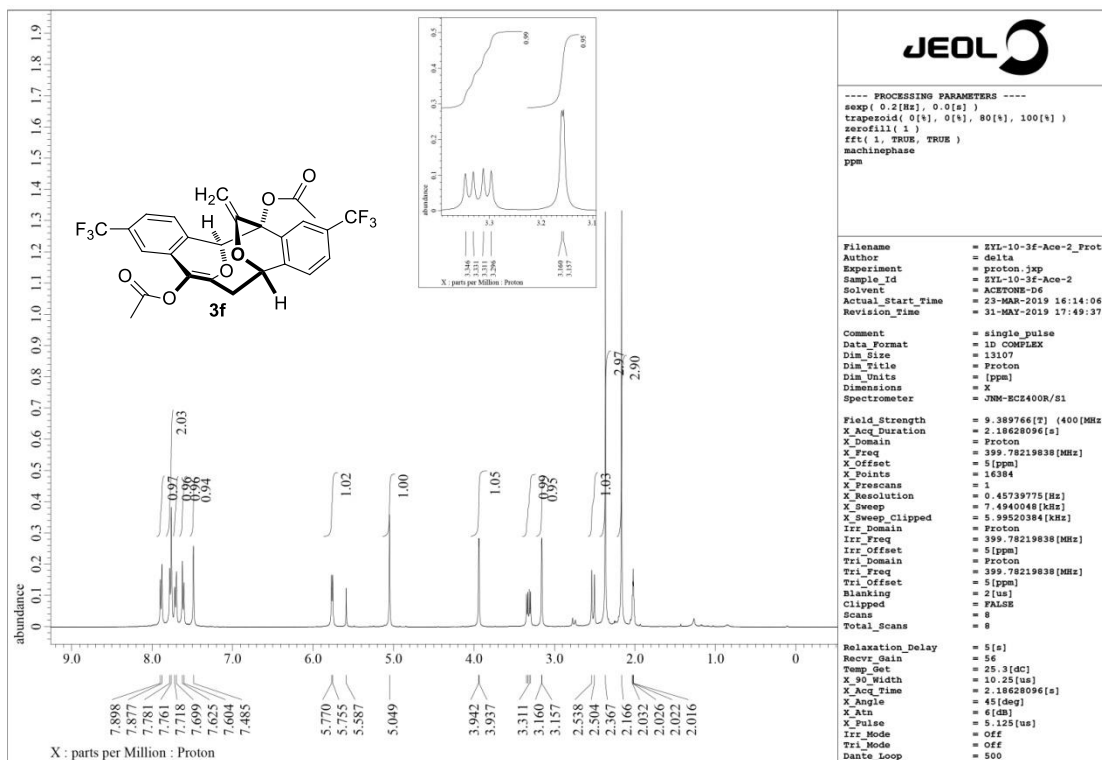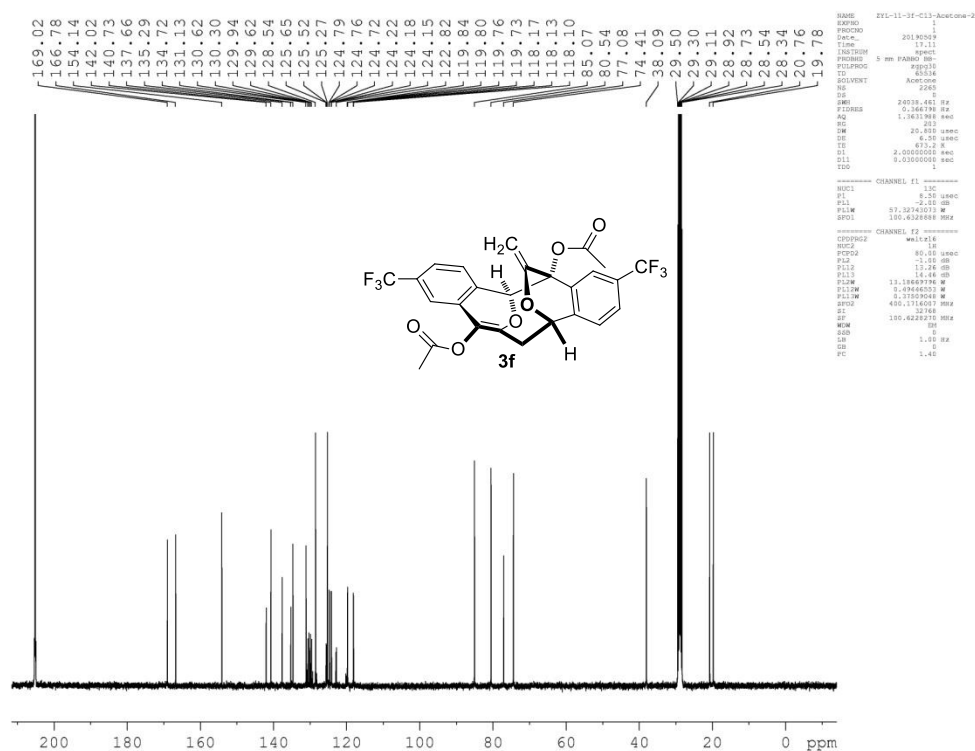

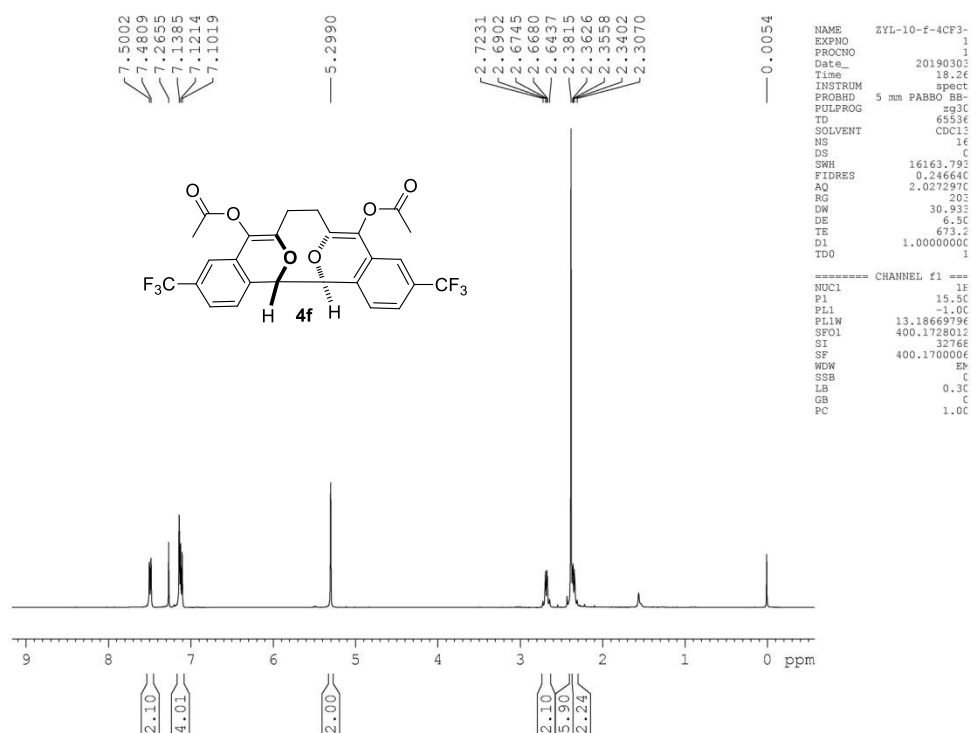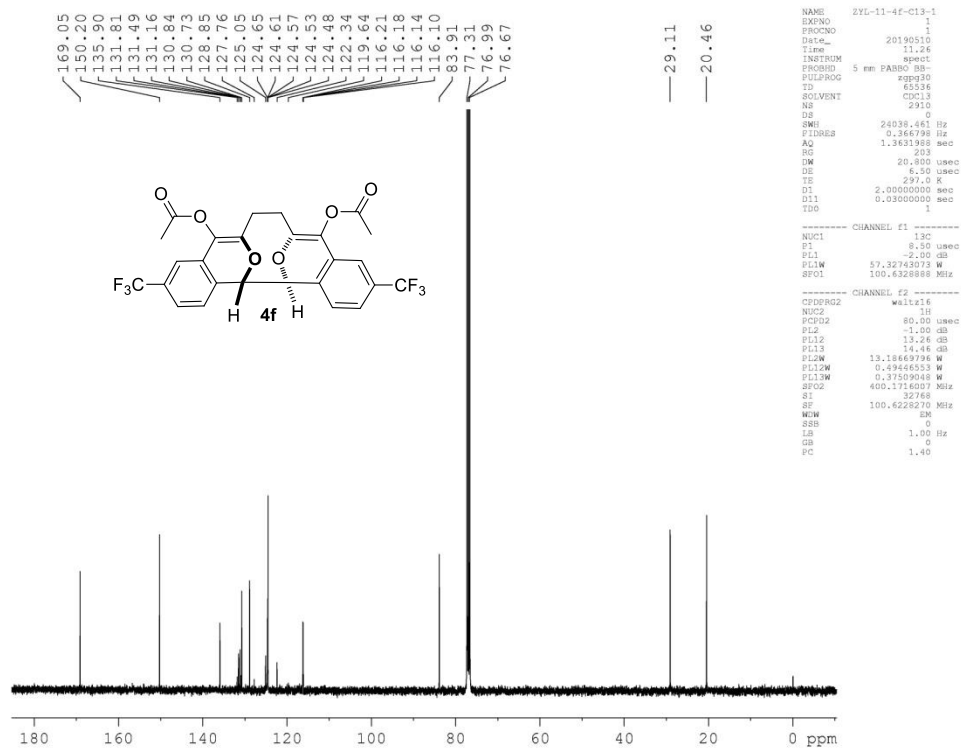

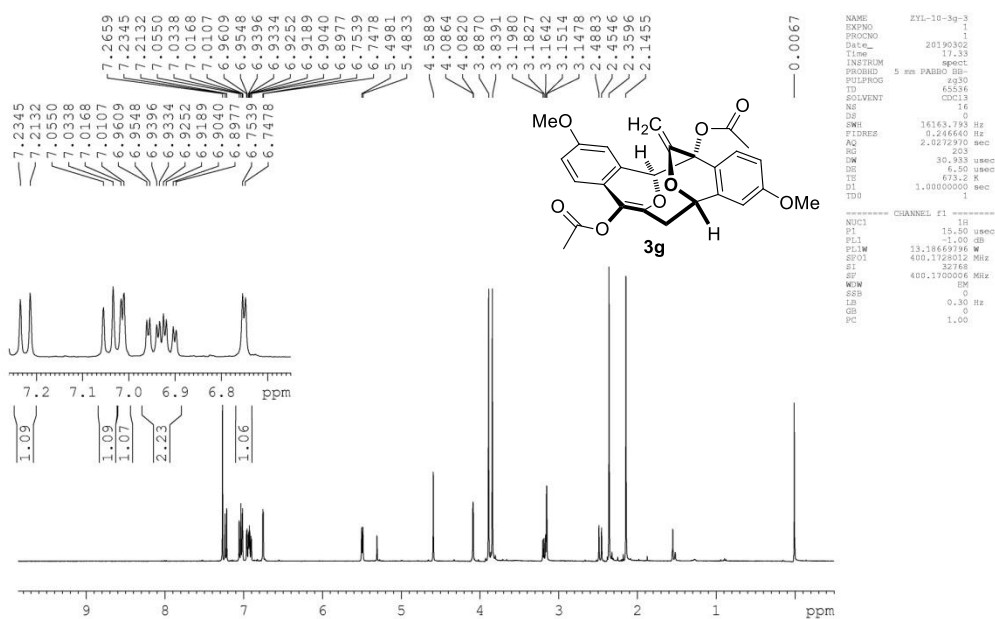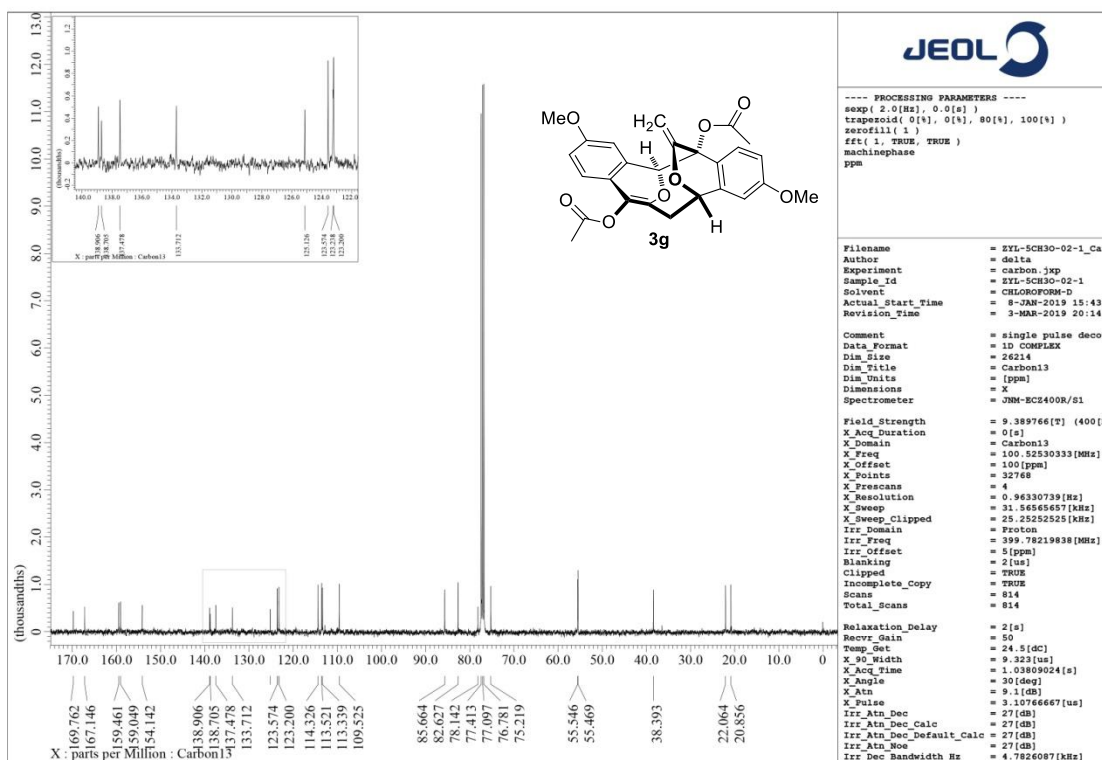

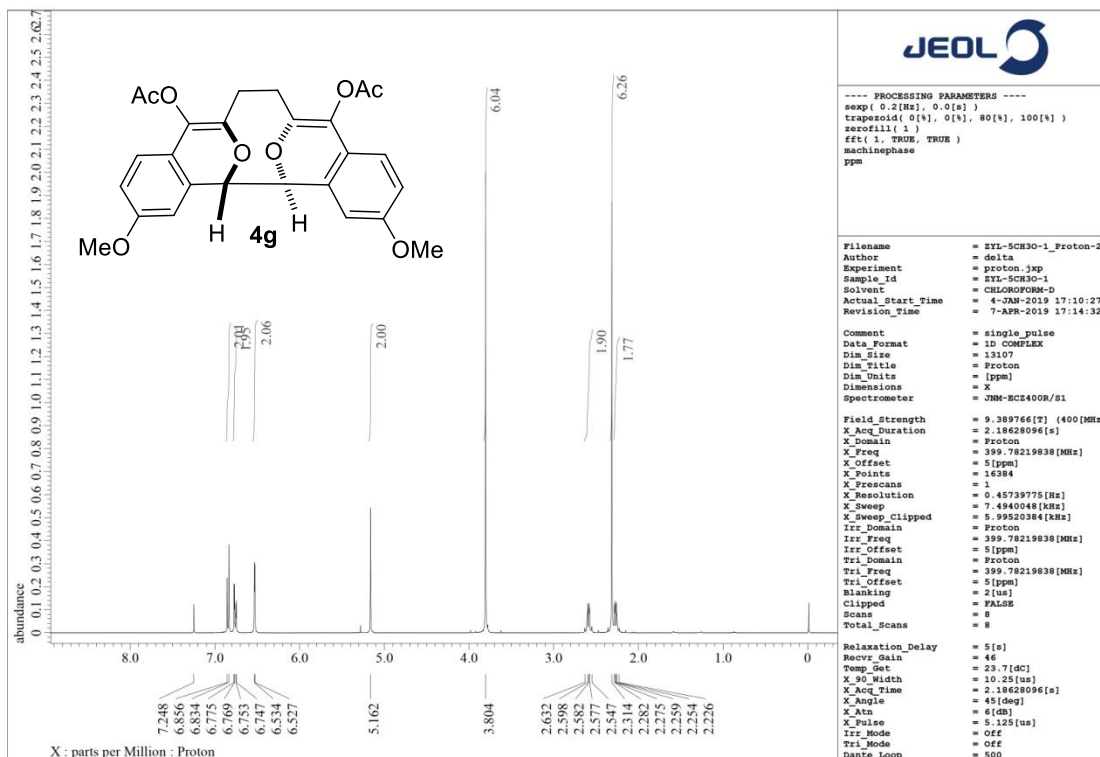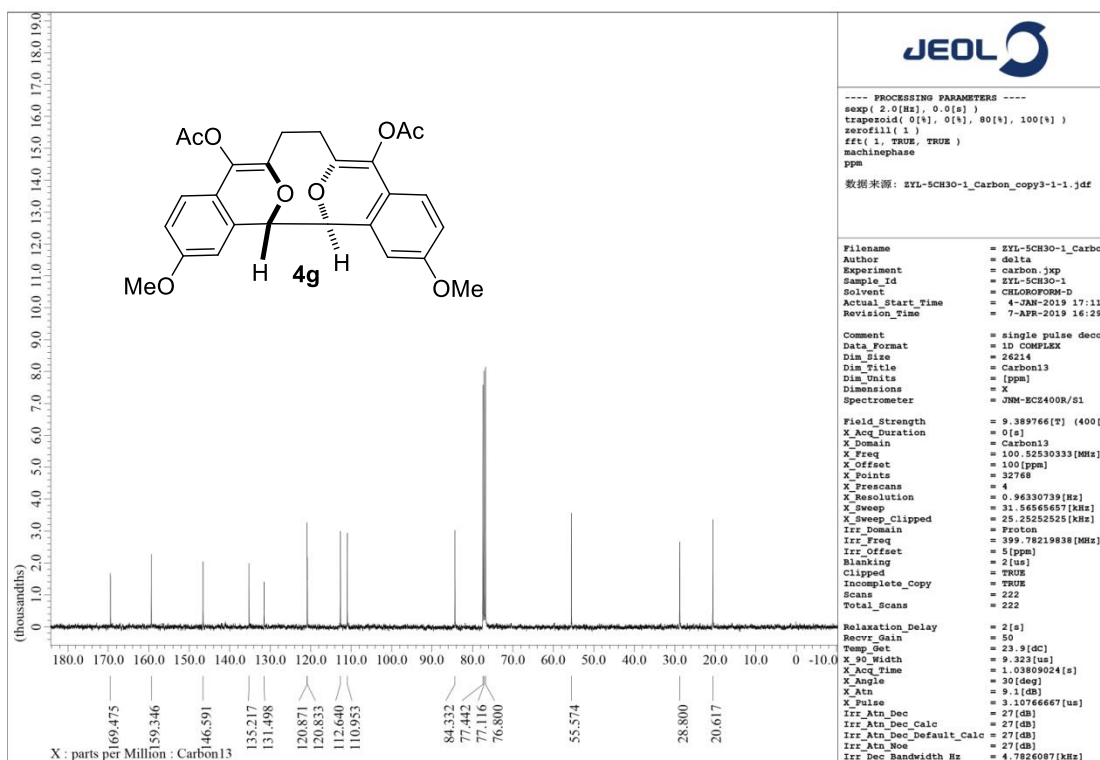

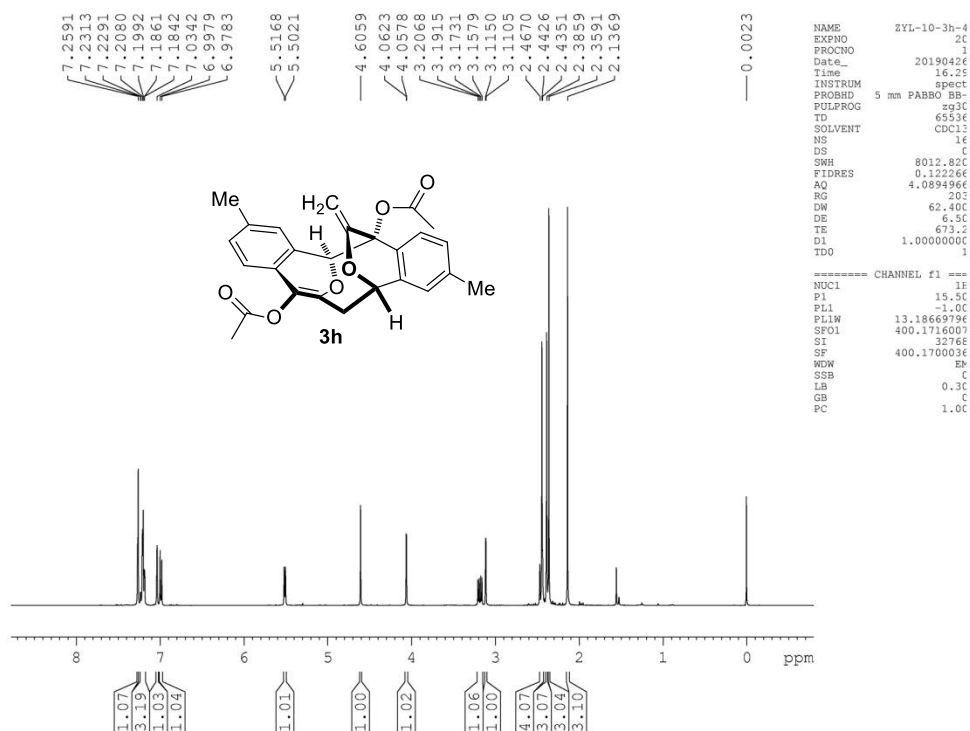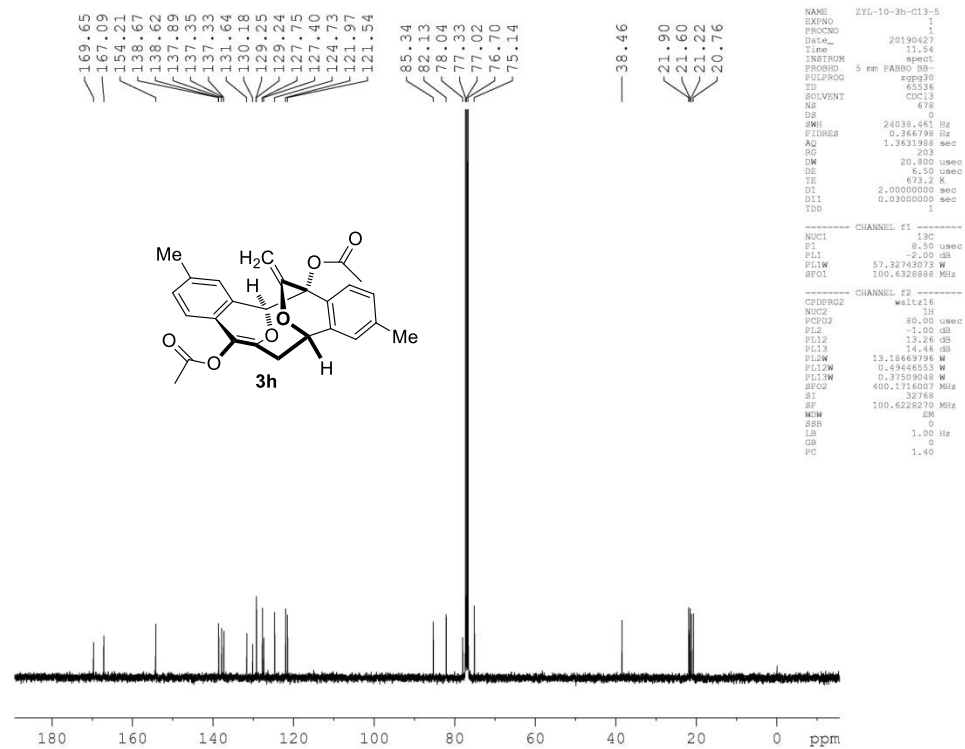

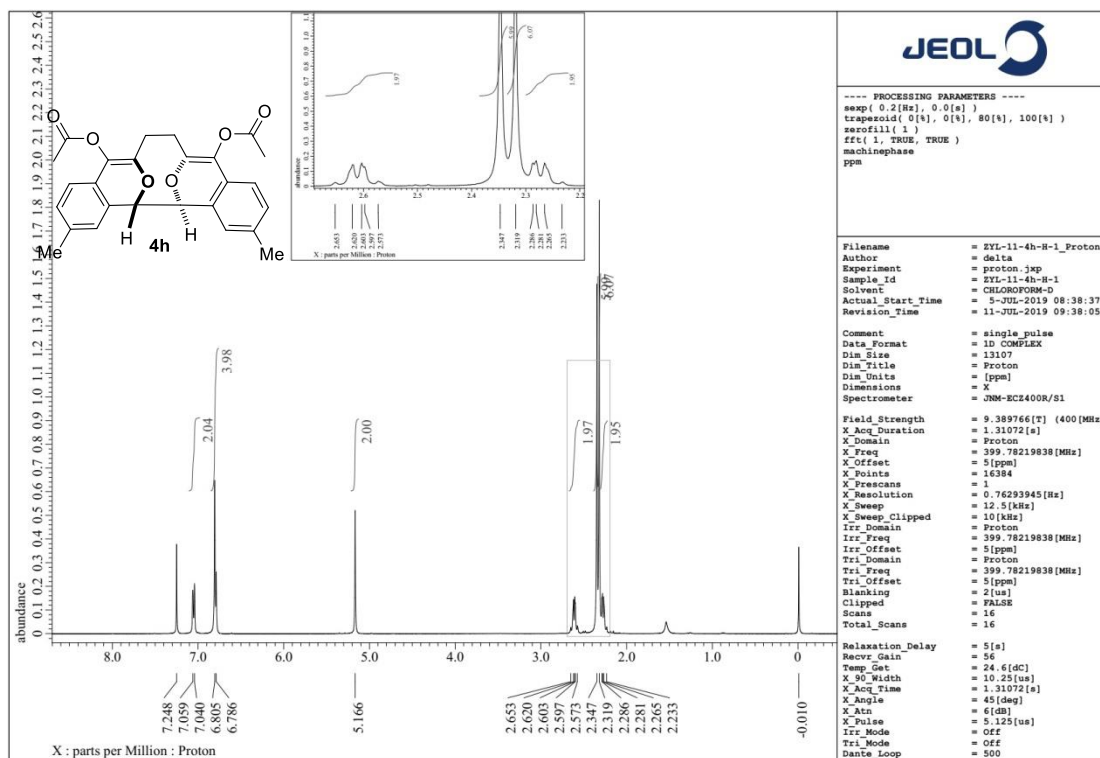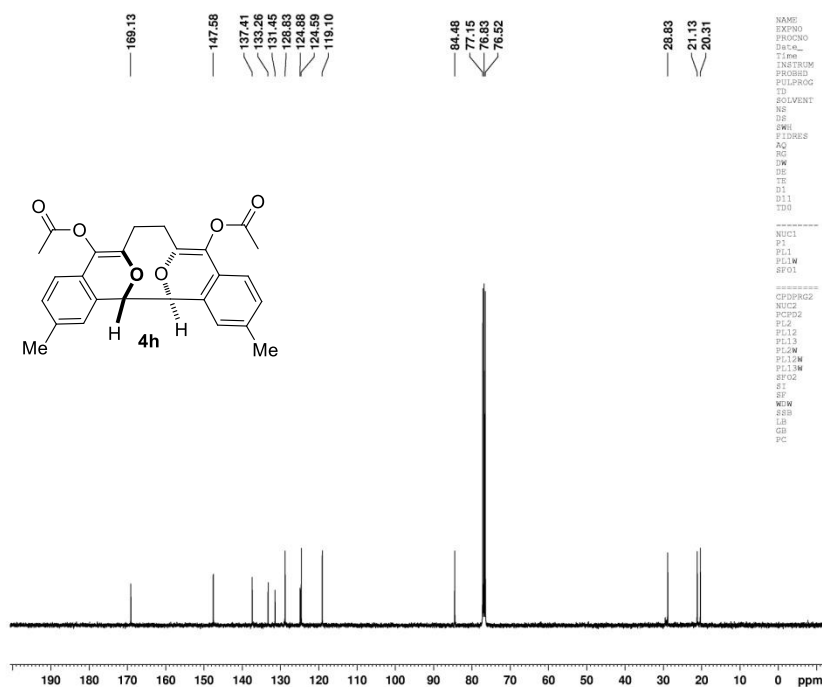

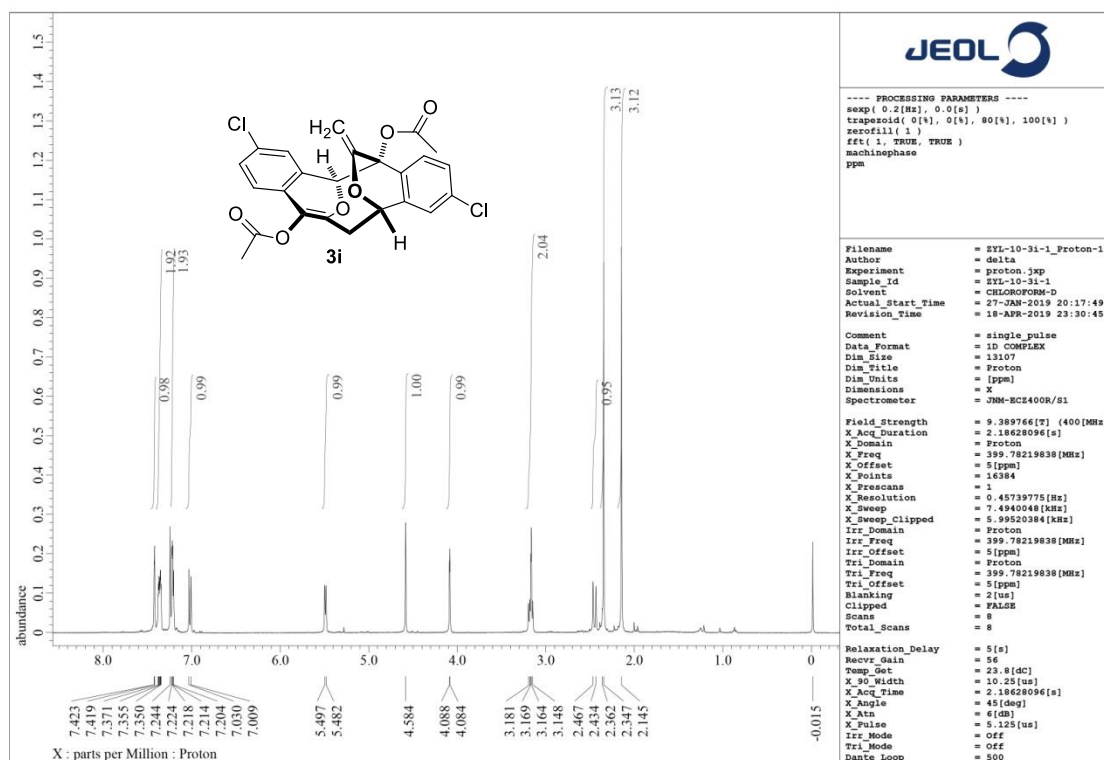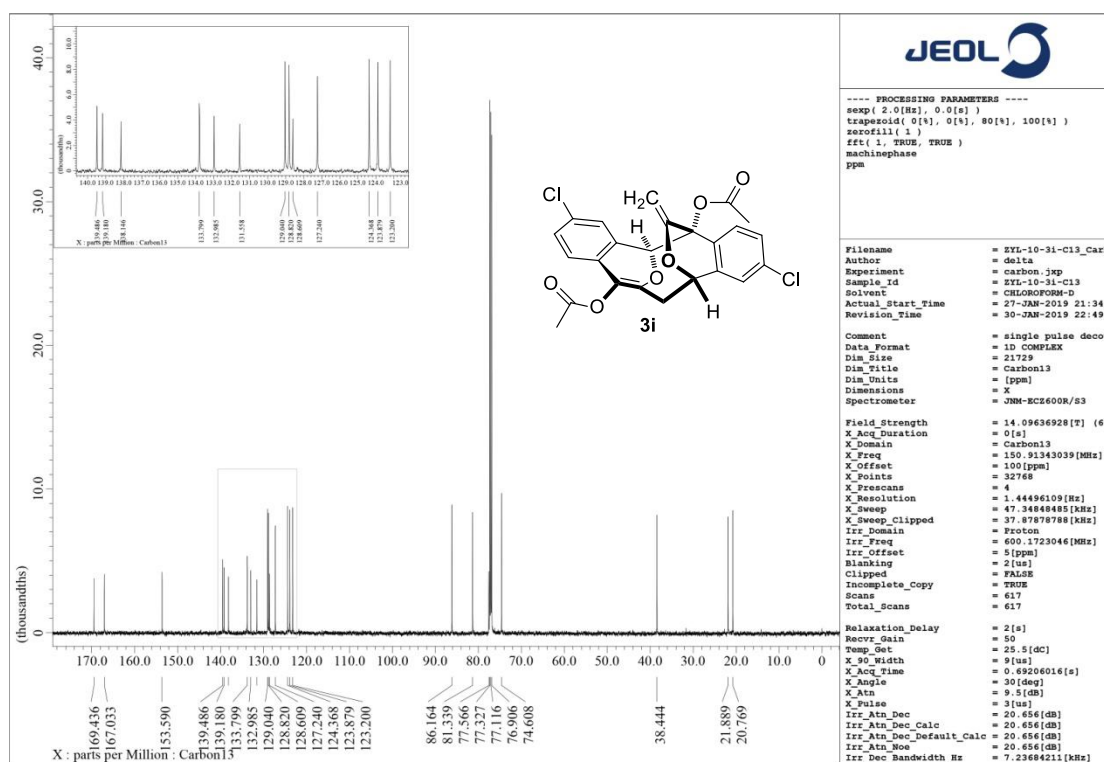

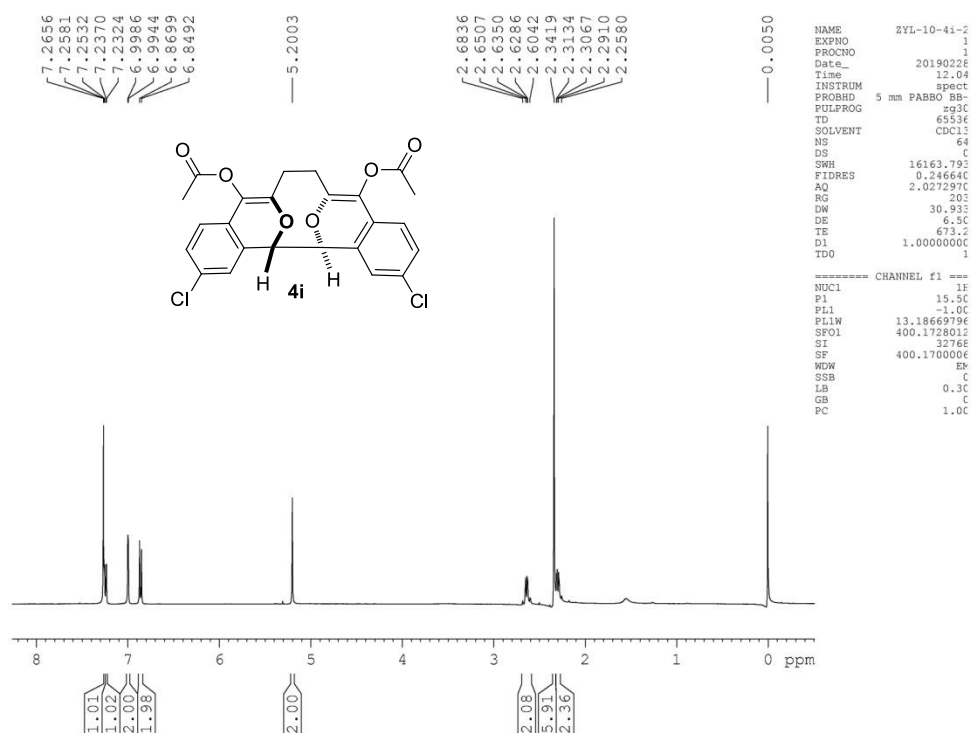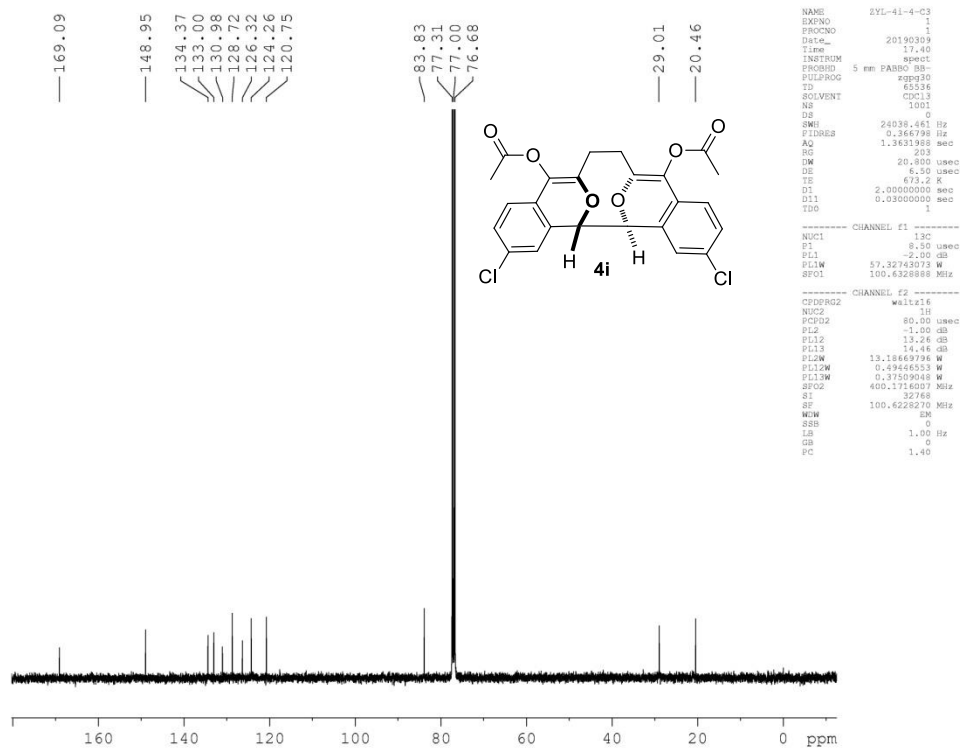



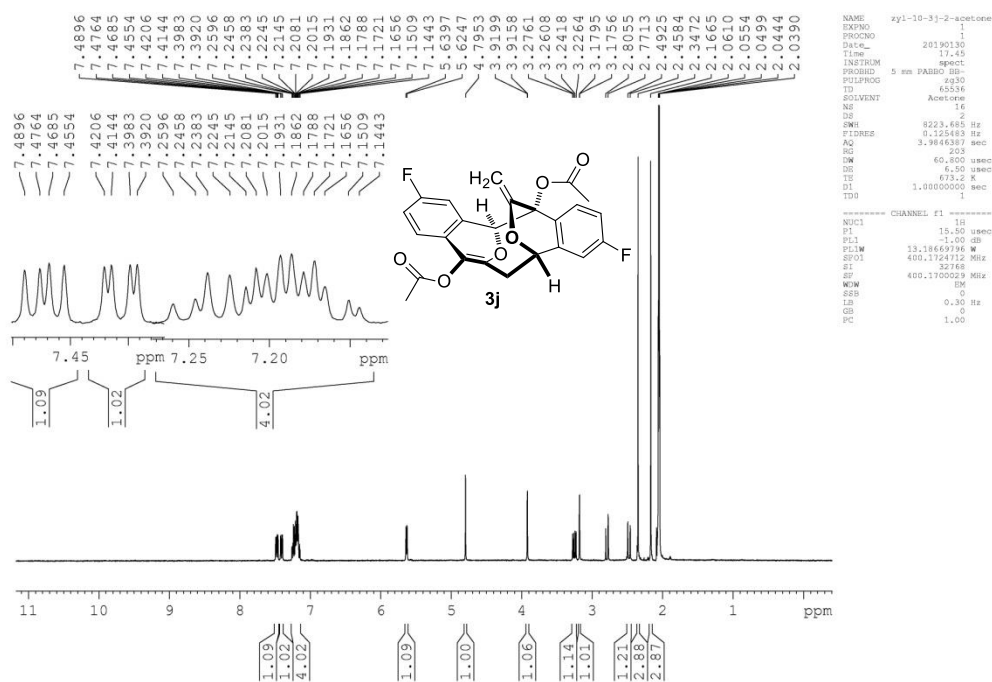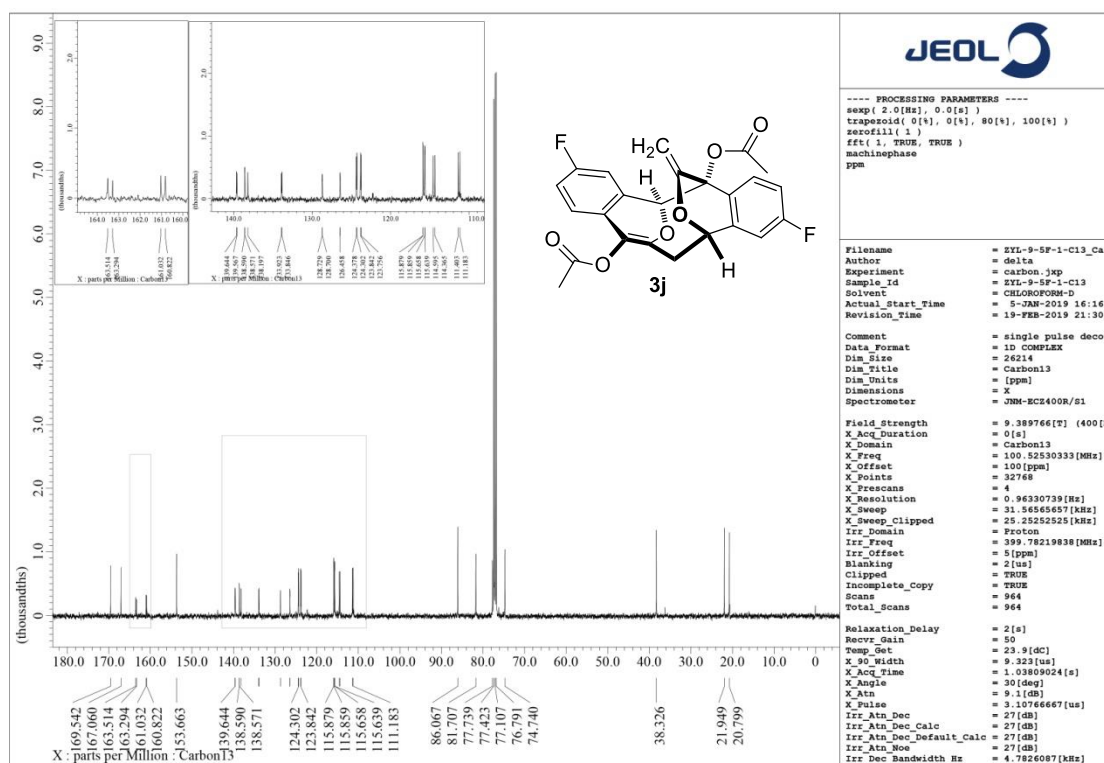

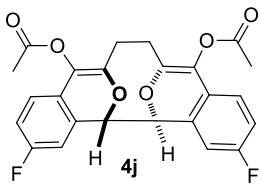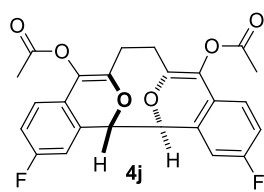

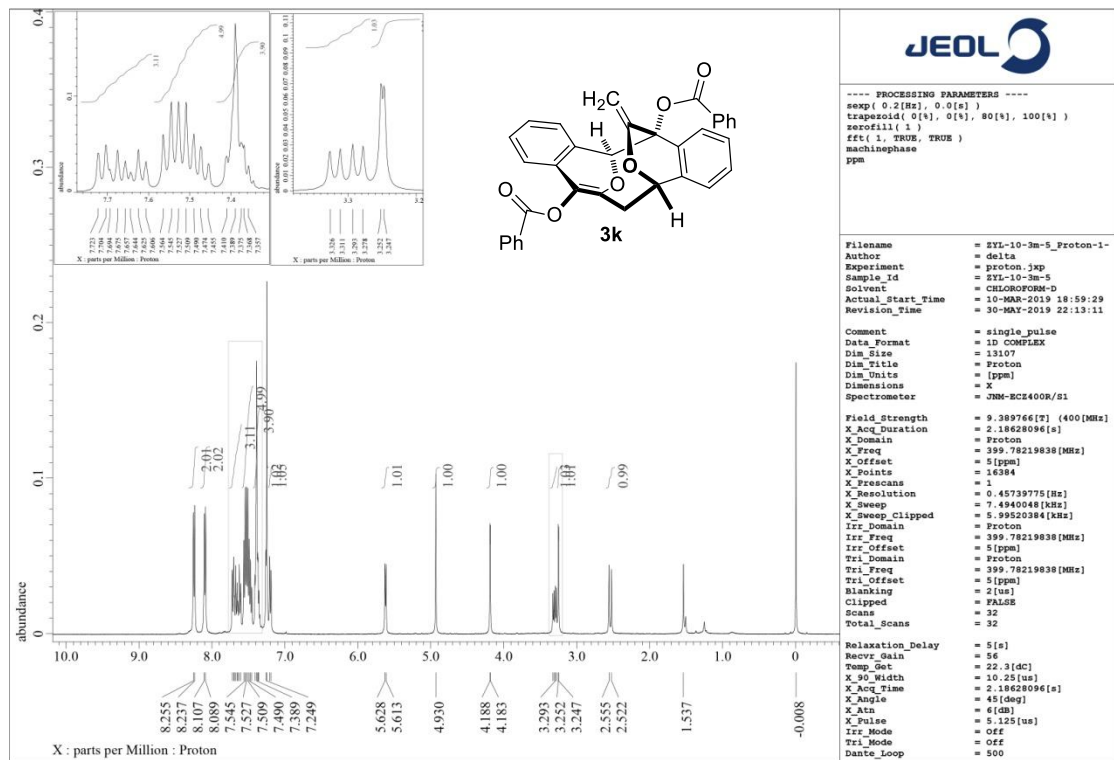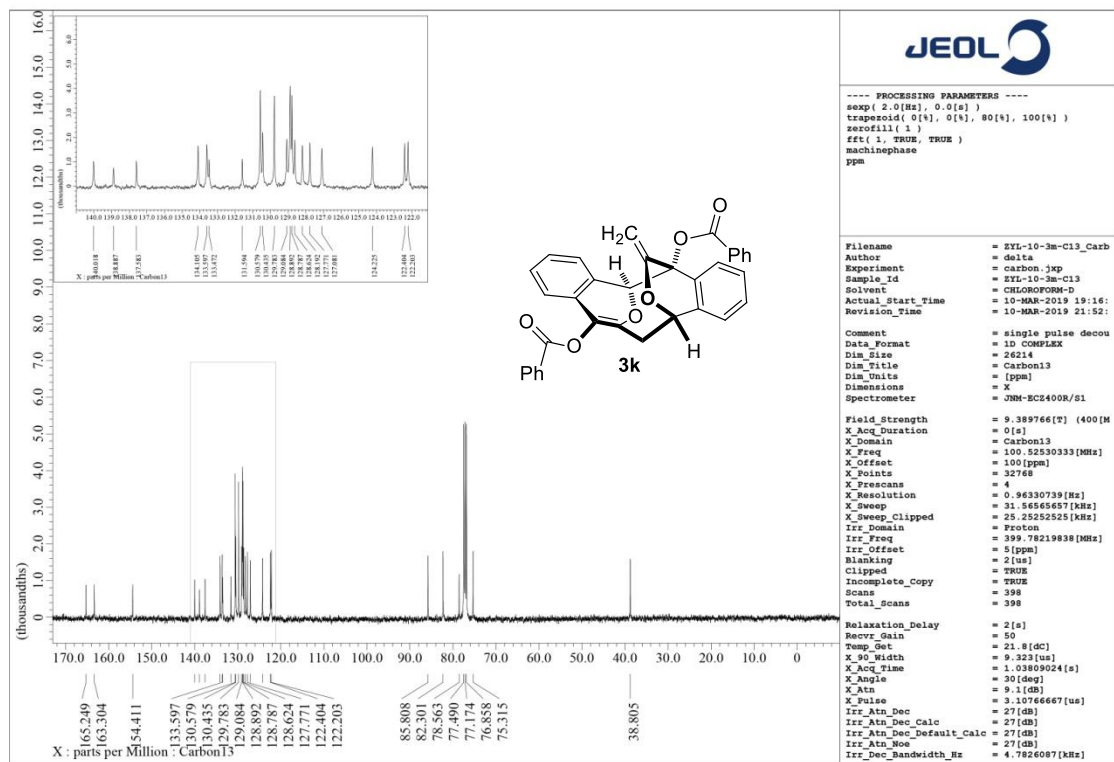

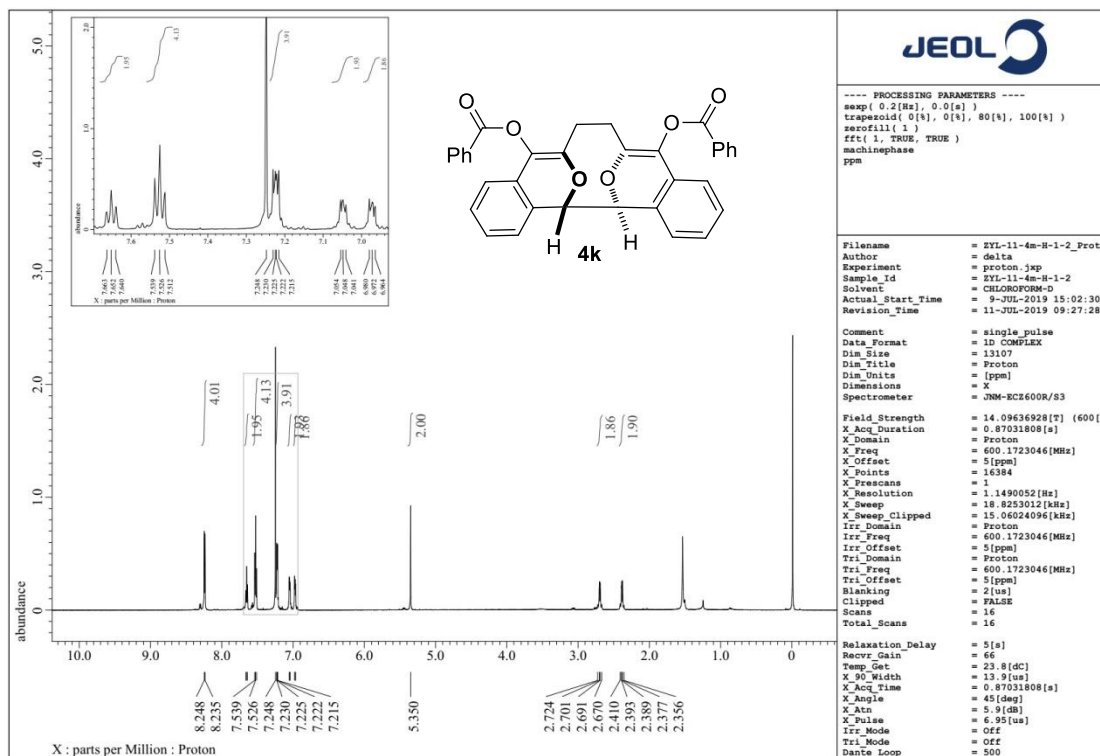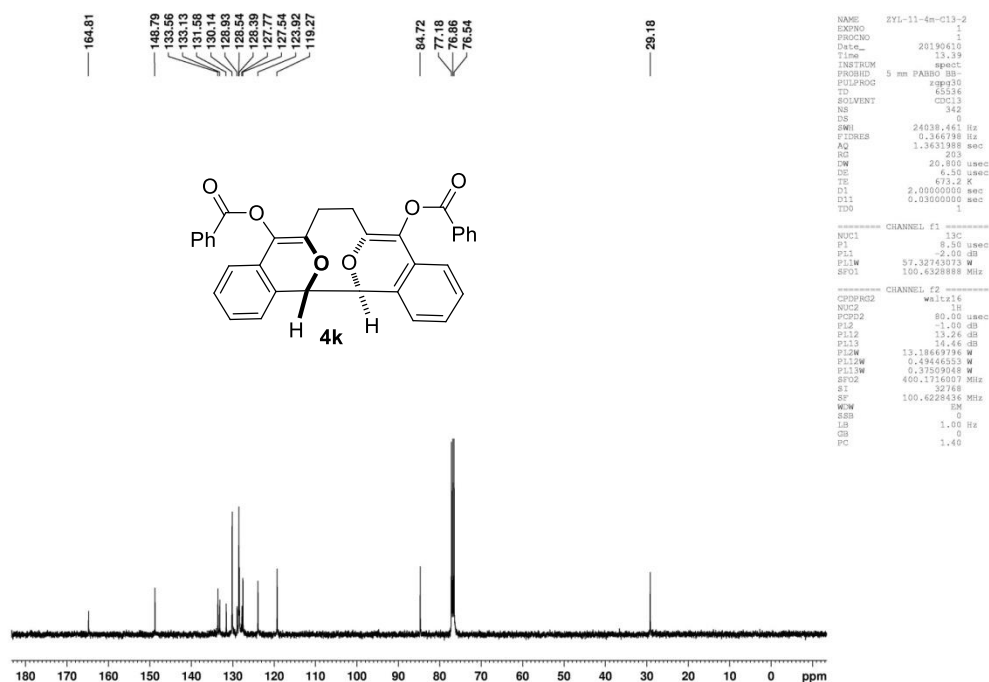

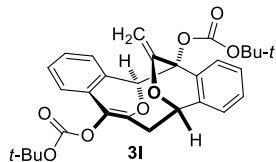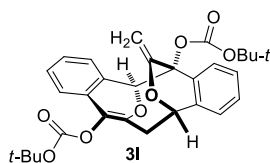

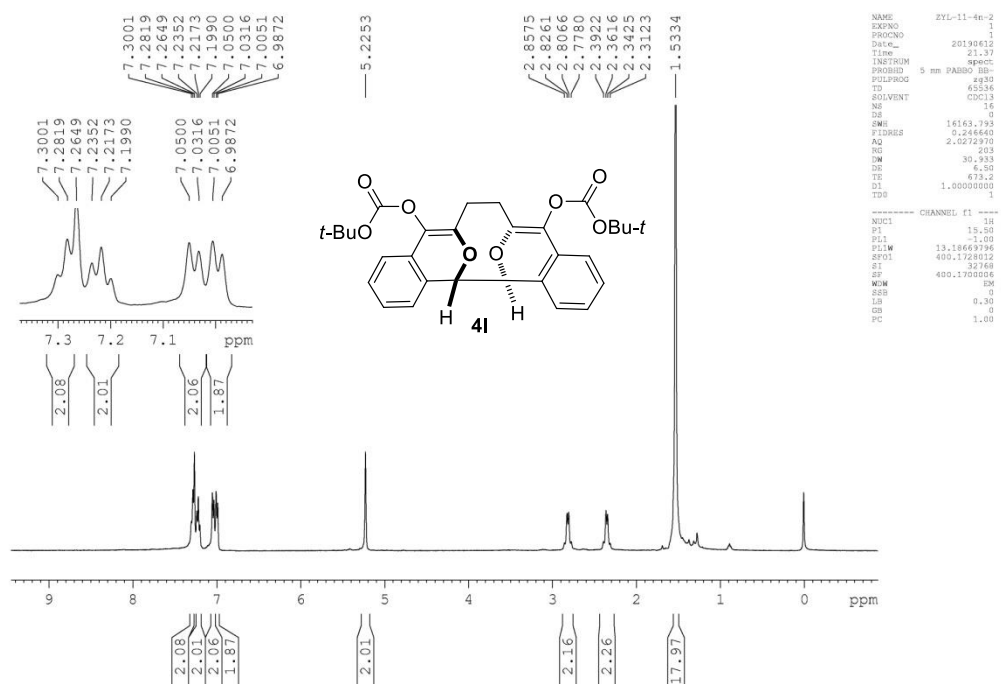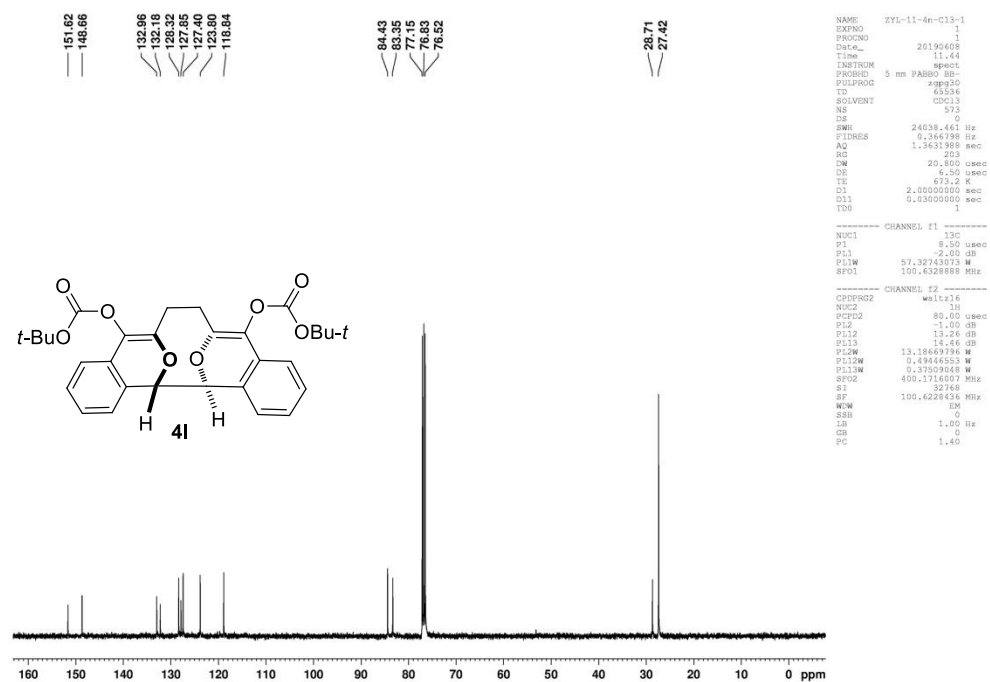

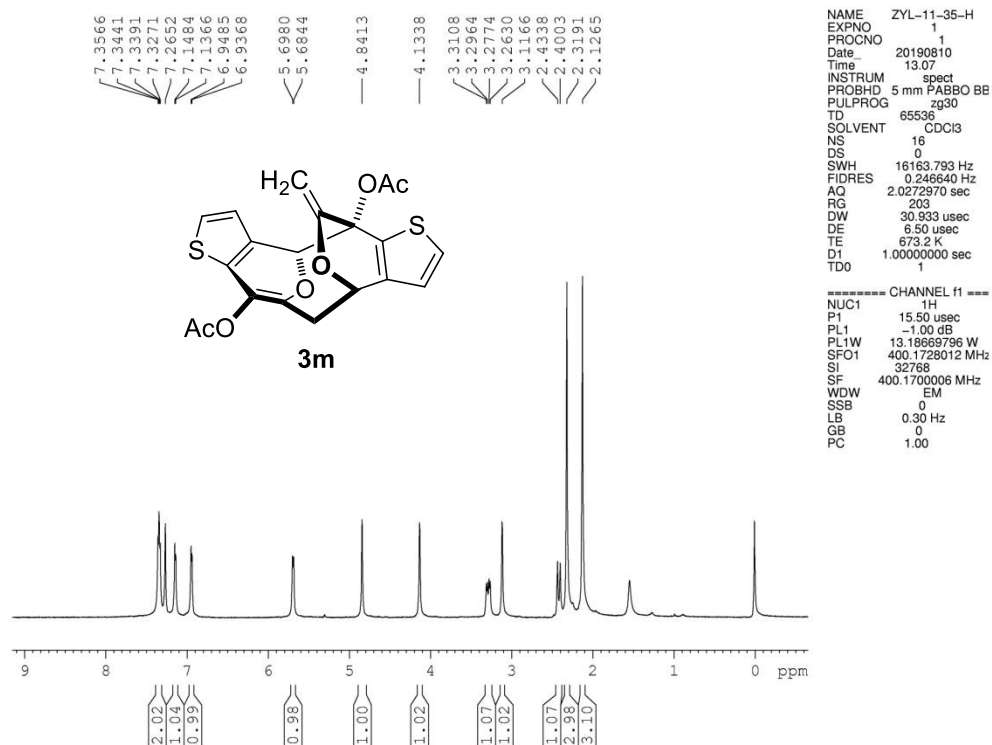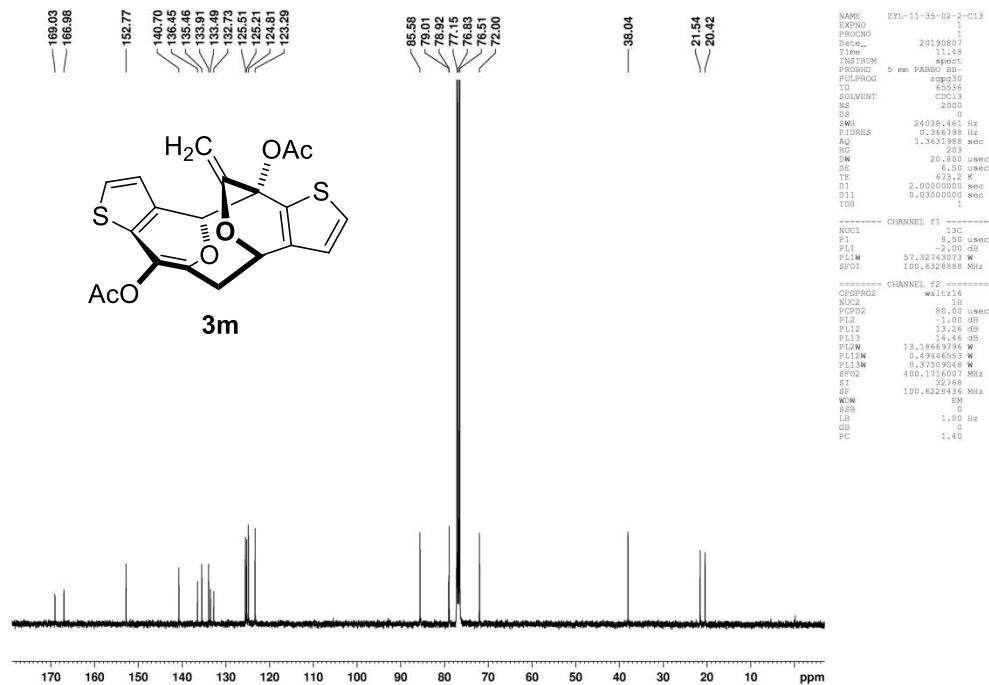

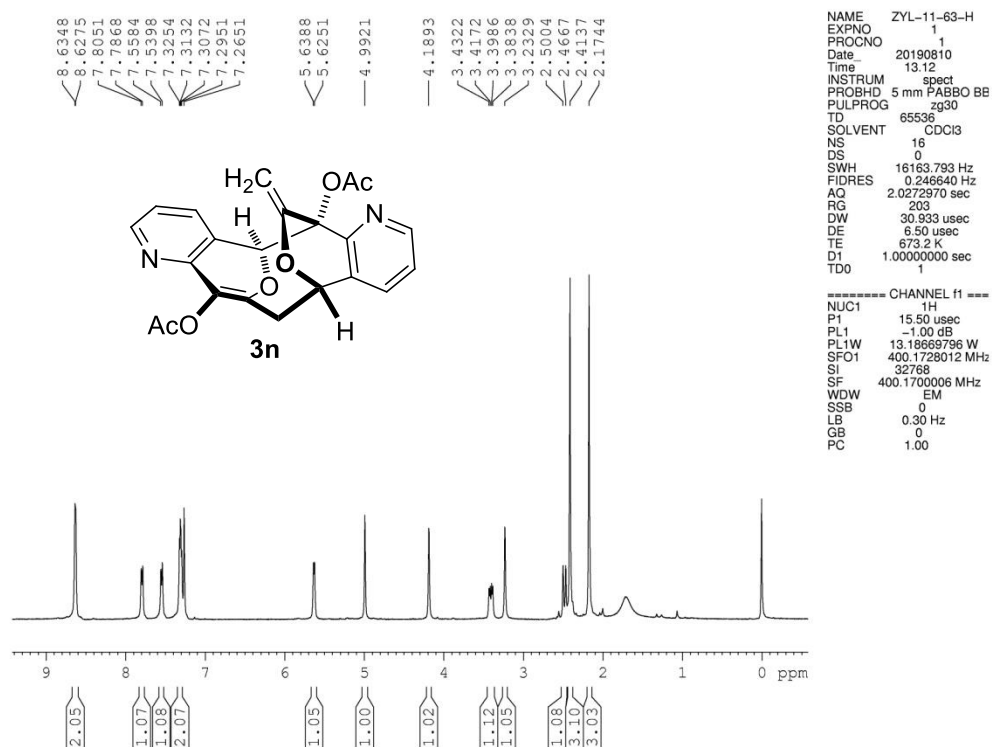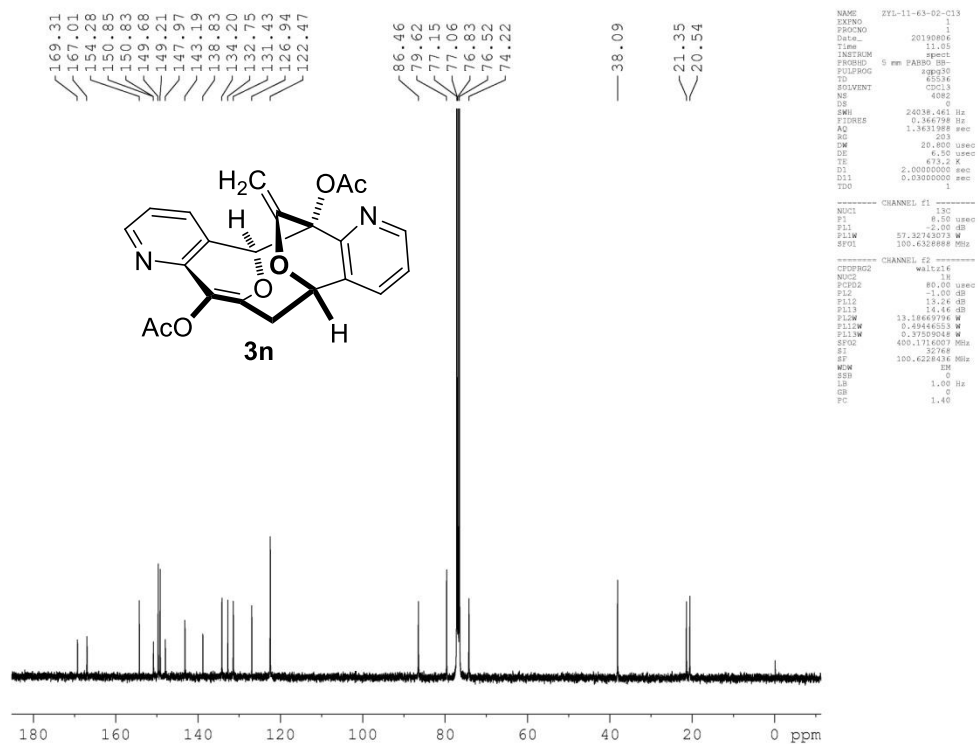



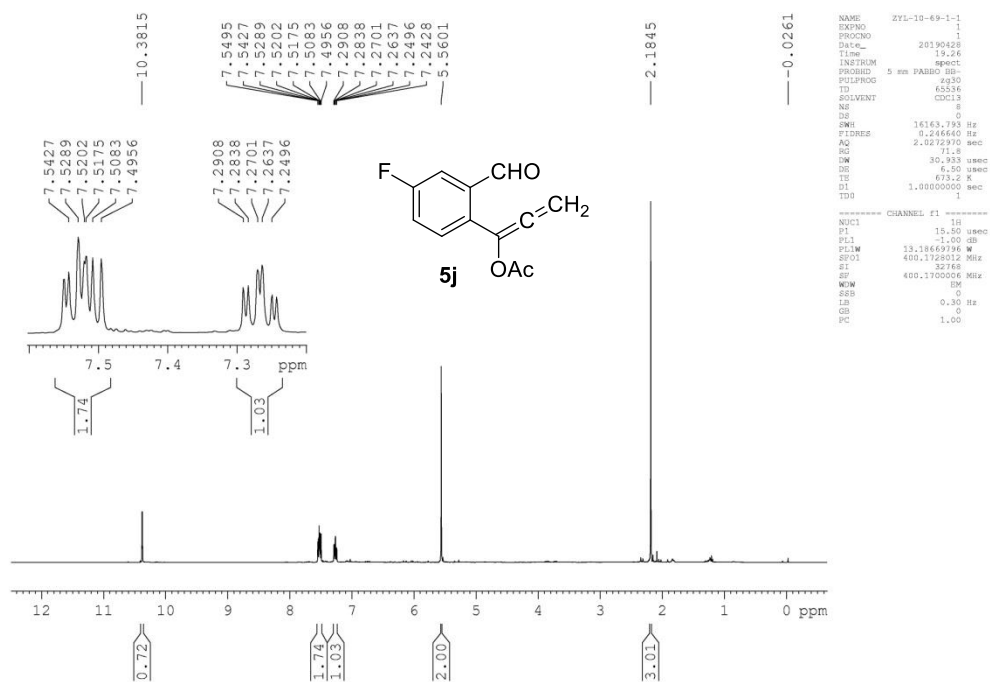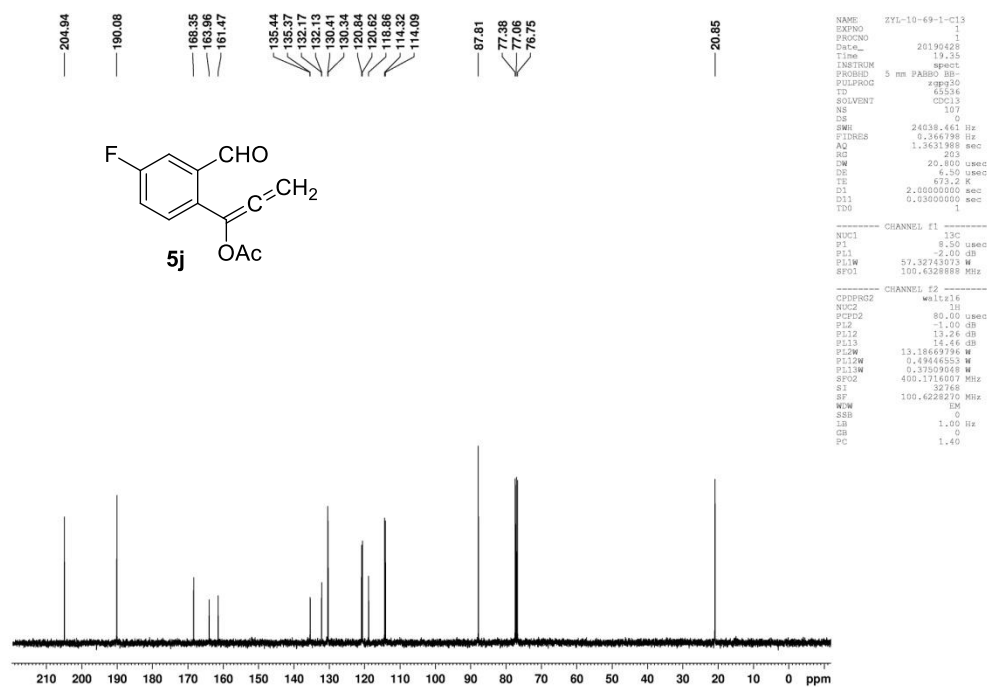

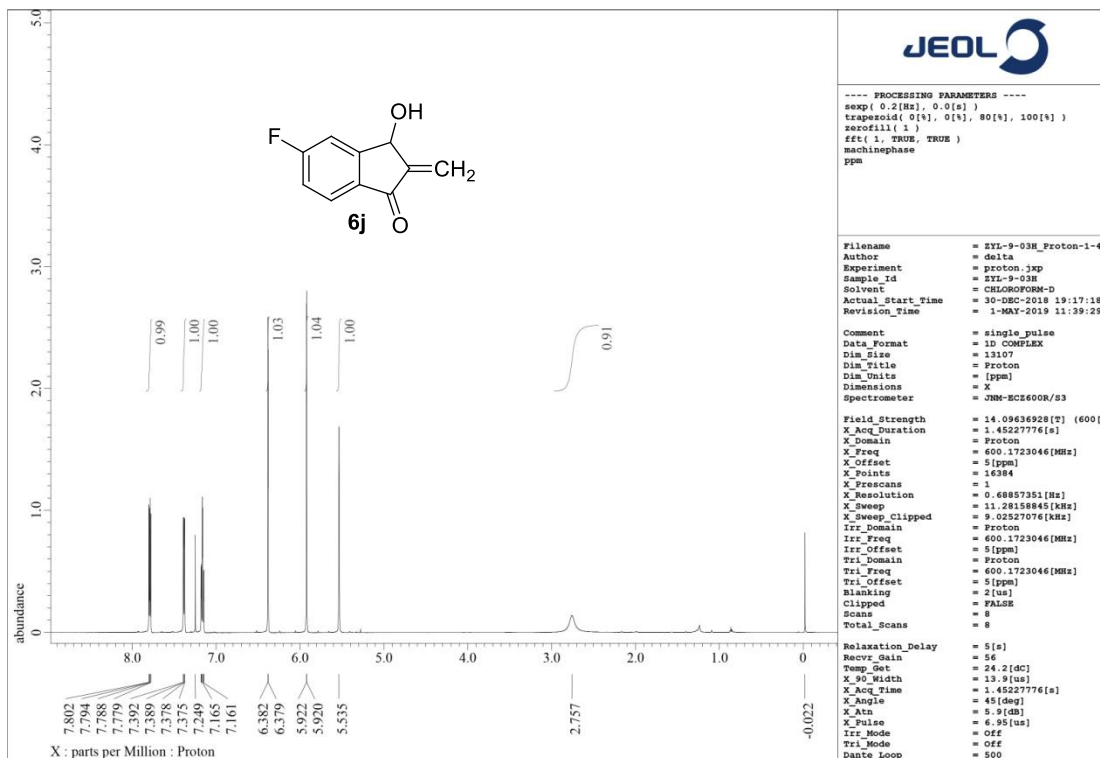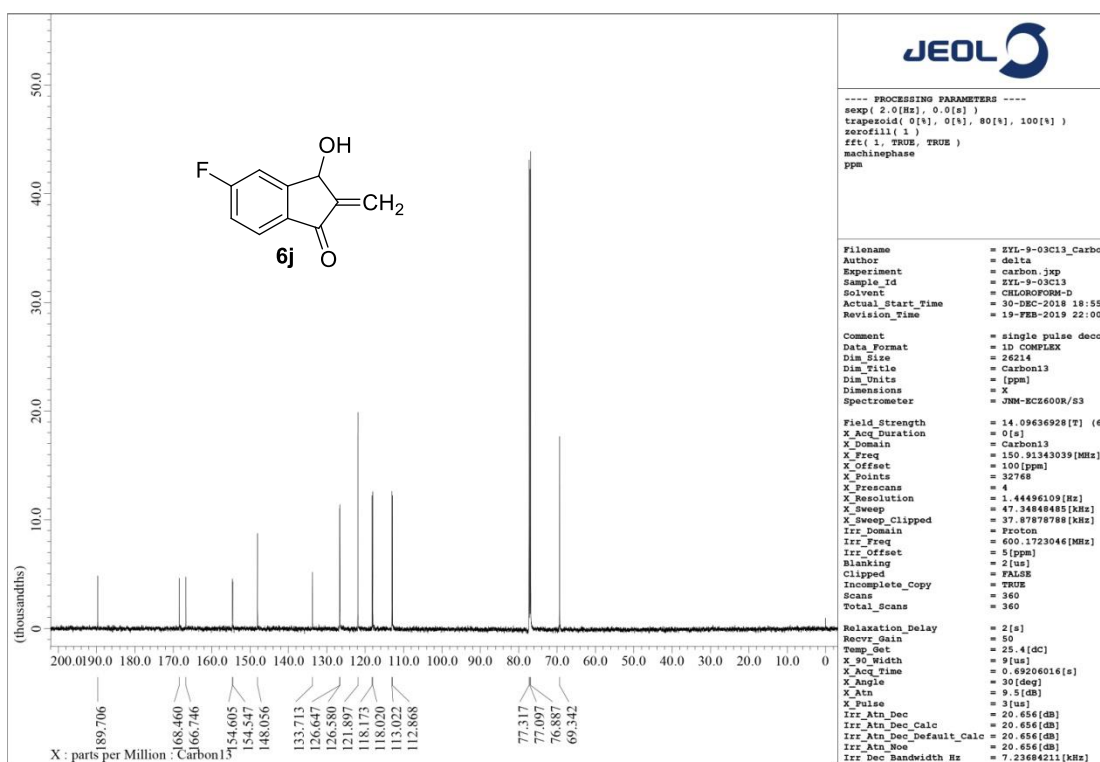

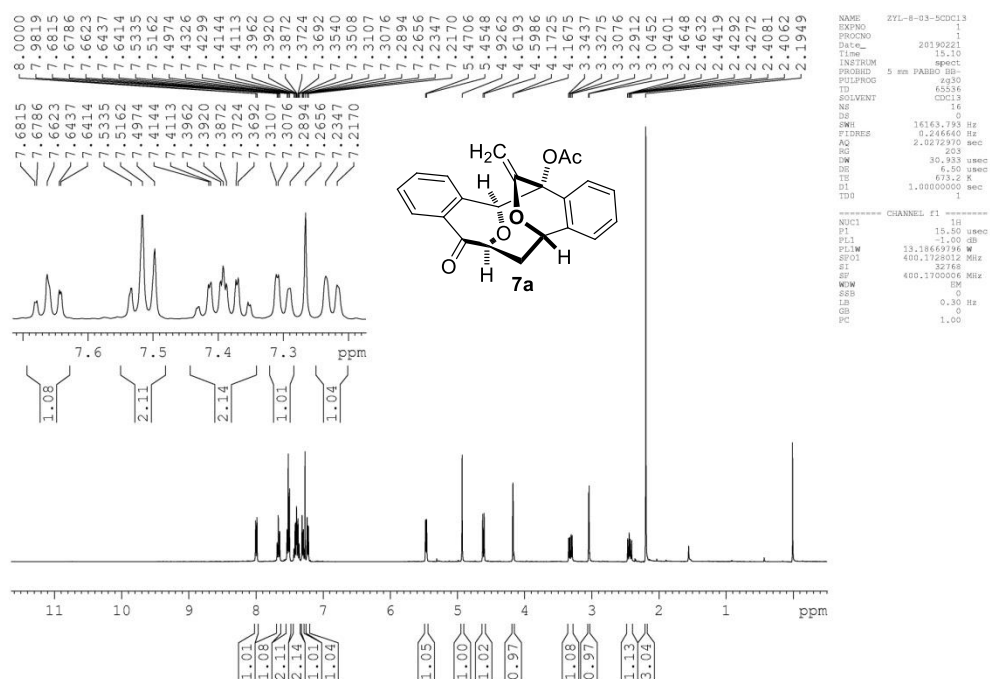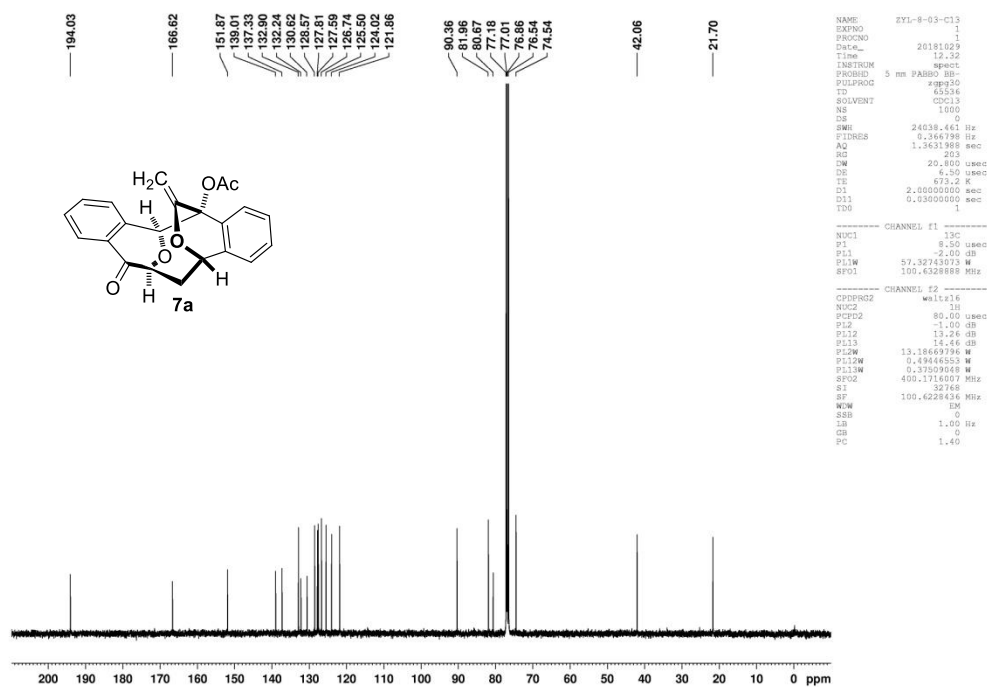

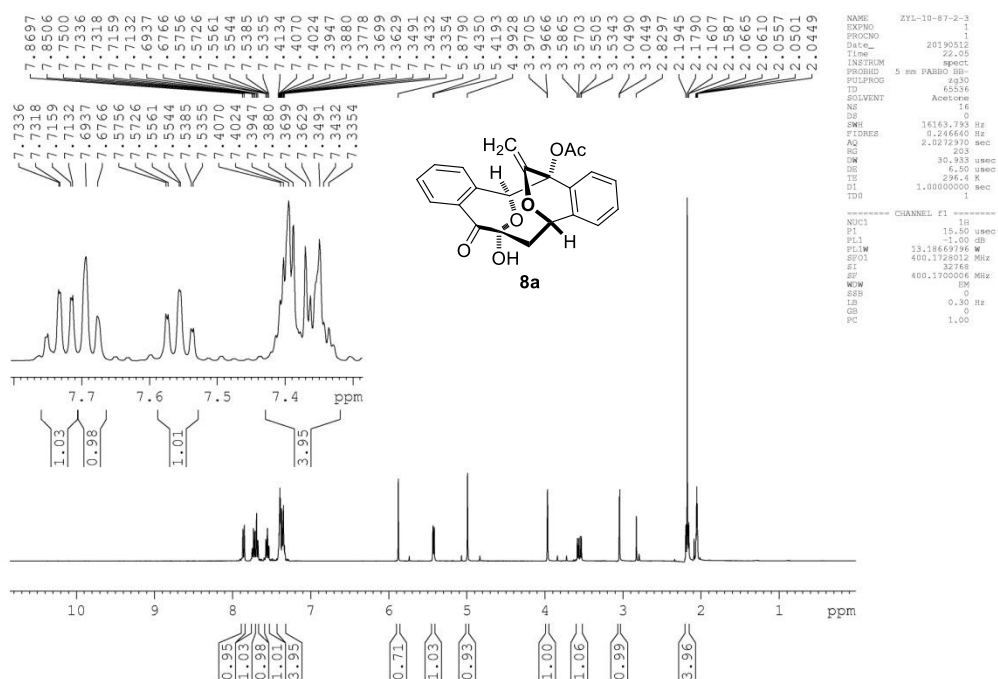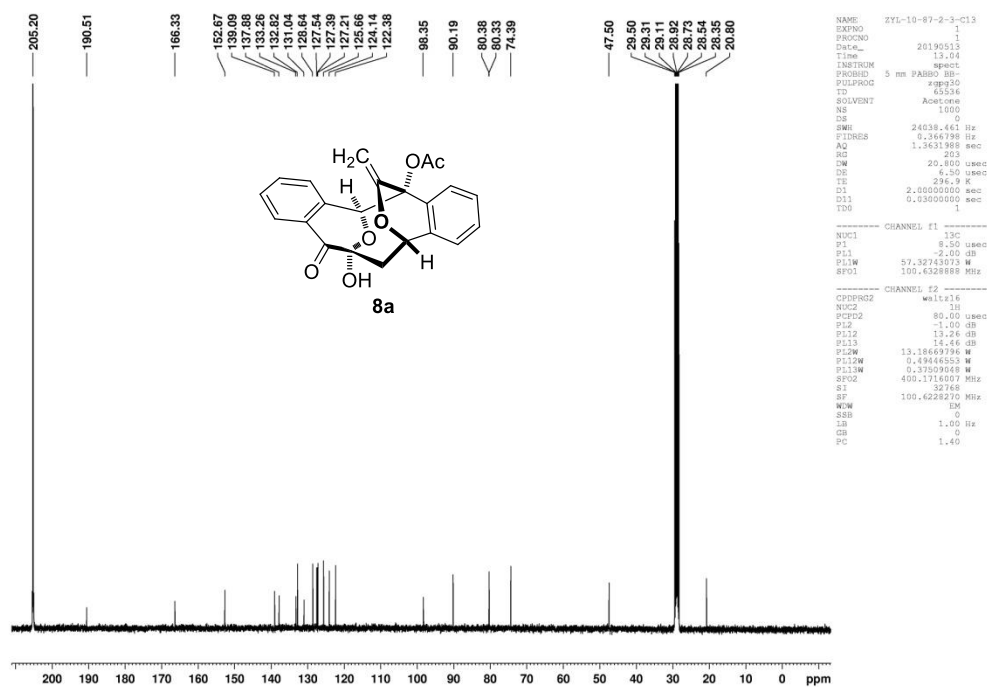

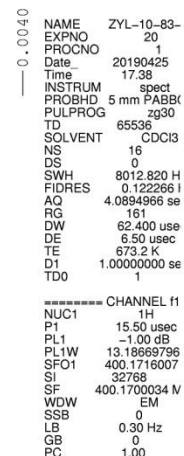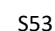

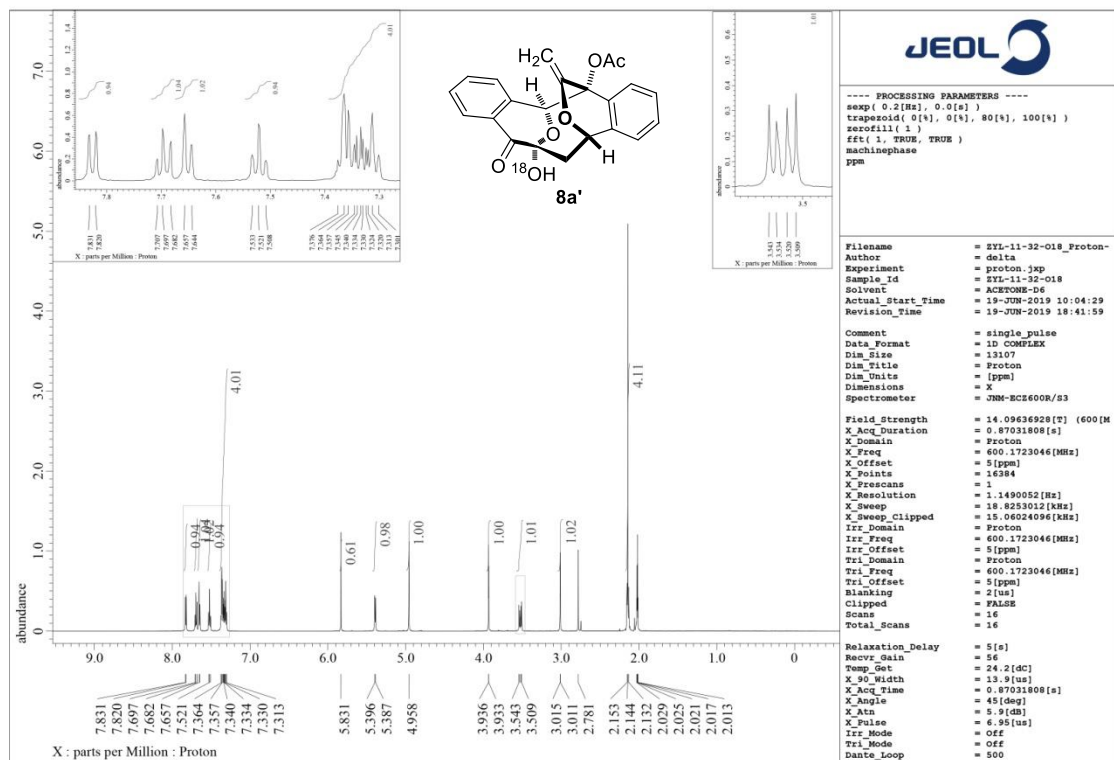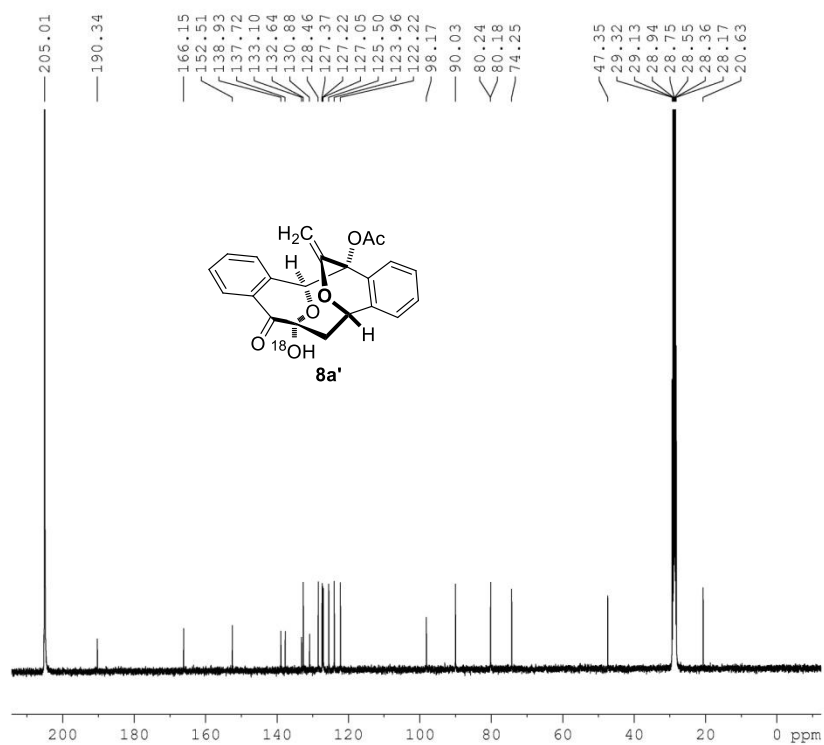

#### 4. HRMS spectra of O<sup>18</sup>-labelled product 8a.

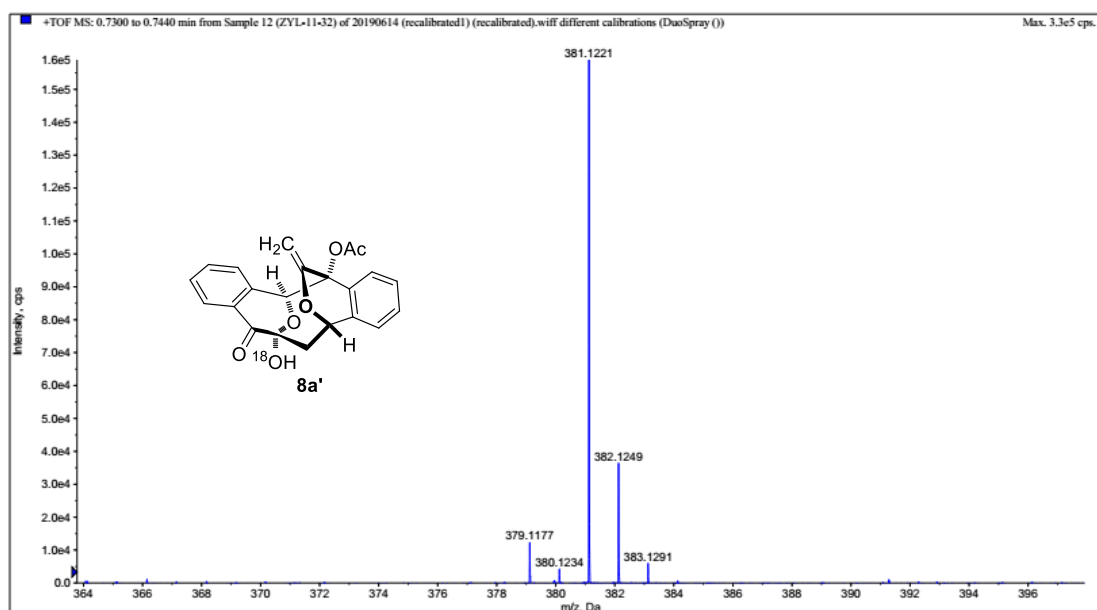

Supplement: Supplementary file 1 [file 17440031]
